# Supplementary material for: Identification of mitochondrial-related genes to evaluate the immune infiltration and prognosis of lung adenocarcinoma
Source: PeerJ journal article supplement (doi:10.7717/peerj.20262), 2025-11-18
Supplement: FigShareTranslations_StaffER.docx [file FigShareTranslations_StaffER.docx]

**The new URL for the public dataset:**

DOI: 10.6084/m9.figshare.28751039

<https://figshare.com/s/638f32d77f619009c734>

**The translations for the non-English text used in figshare:**

Flow Cytometry Data

This folder contains raw data for flow analysis.Click on the folder, which includes two subfolders named "TMRM" and "ROS". It consists of four folders named "NC", "siSFXN1", "siMTFR2", and "siCPS1" respectively. Each folder contains 3 replicates.
