# Supplementary material for: Identification of mitochondrial-related genes to evaluate the immune infiltration and prognosis of lung adenocarcinoma
Source: PeerJ journal article supplement (doi:10.7717/peerj.20262), 2025-11-18
Supplement: peerj117281_S5_supp20250914.docx [file peerj117281_S5_supp20250914.docx]

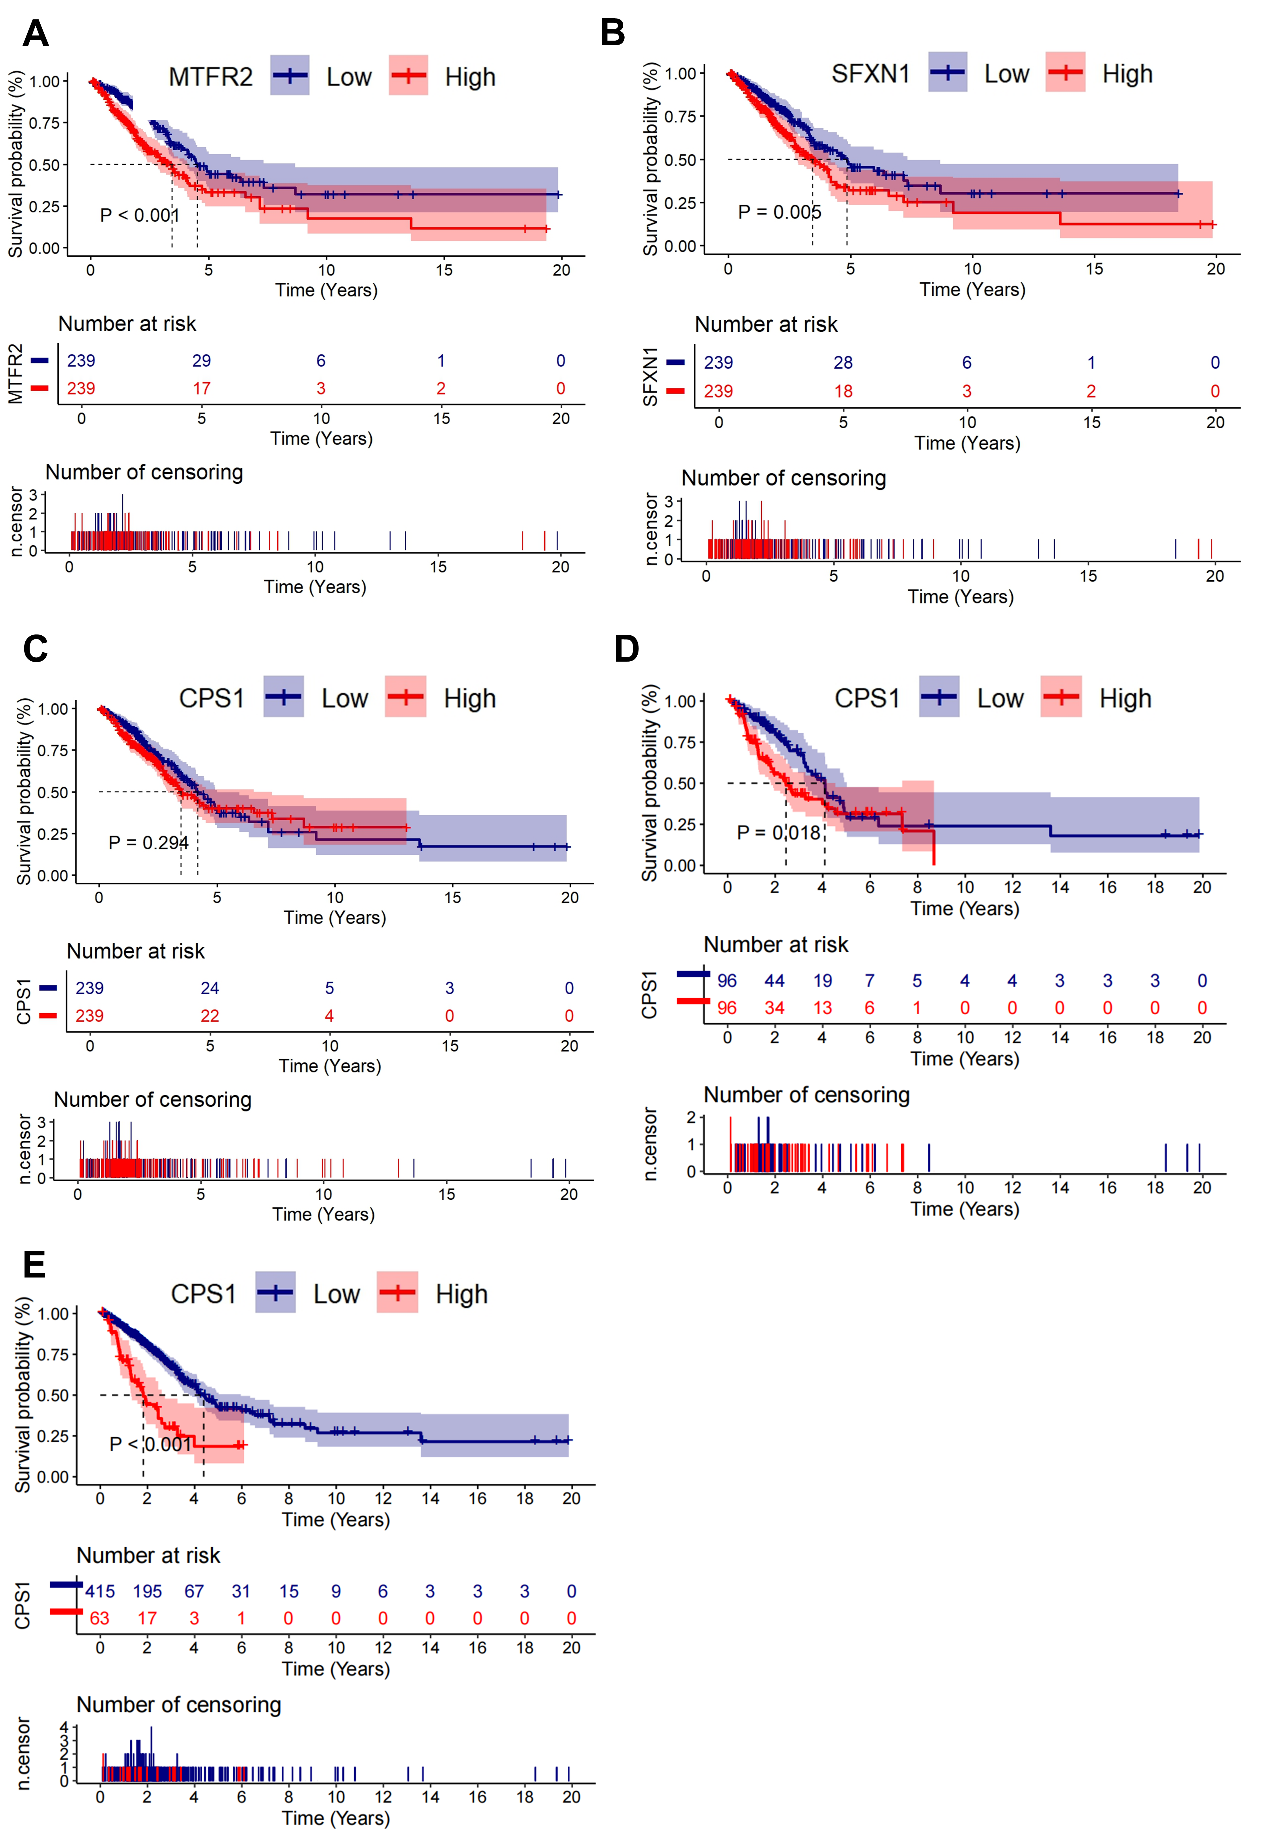


**Fig.S1 Kaplan-Meier curves comparing OS between LUAD patients with high versus low *MTR genes* expression.**

1. Kaplan-Meier curves comparing OS between LUAD patients with high versus low *MTFR2* expression (log-rank *P*<0.001).
2. Kaplan-Meier curves comparing OS between LUAD patients with high versus low *SFXN1* expression (log-rank *P*=0.005).
3. Kaplan-Meier curves comparing OS between LUAD patients with high versus low CPS1 expression, using the median value as the cutoff (log-rank *P*=0.294).
4. Kaplan-Meier curves comparing OS between LUAD patients with high versus low CPS1 expression, using the 20th and 80th percentiles as the cutoffs (high expression: ≥80th percentile; low expression: ≤20th percentile; log-rank *P*=0.018).
5. Kaplan-Meier curves comparing OS between LUAD patients with high versus low CPS1 expression, using the optimal cutoff value (7.33) identified by X-tile (high expression: ＞7.33; low expression: ≤7.33; log-rank *P*＜0.001)


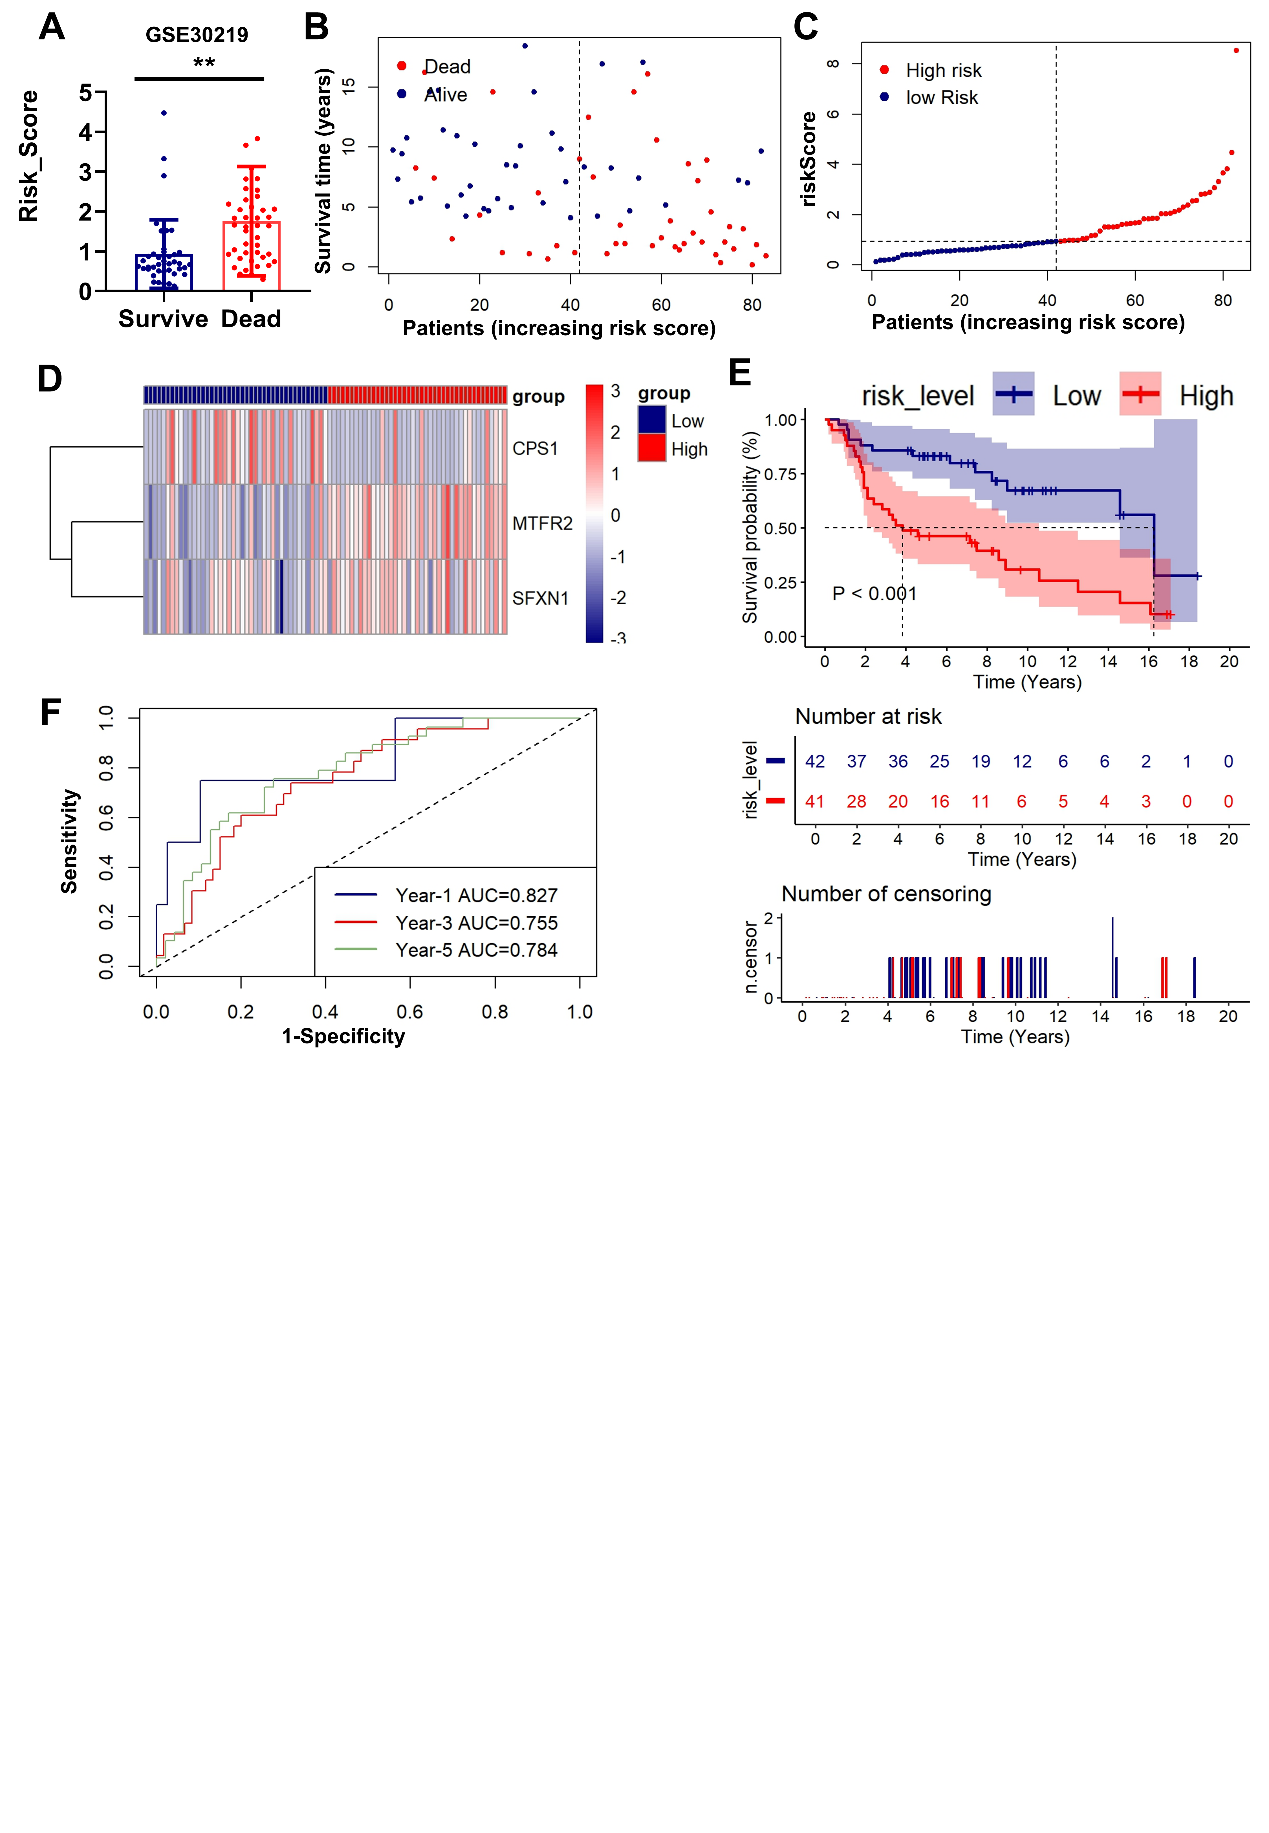


**Fig.** **S2 External validation of the risk stratification model (GSE30219).**

(A) The bar chart compares the risk scores of patients with different prognostic outcomes.

(B) Survival status/time matrix.

(C) Risk score distribution ordered by prognostic value.

(D) Three-gene expression heatmap. Dashed line indicates median risk cutoff.
(E) Kaplan-Meier curves comparing OS between risk subgroups (log-rank *P*=0.001).
(F) Time-dependent ROC curves with AUC values at 1-/3-/5-year intervals.

***P* <0.01, *****P* <0.0001.


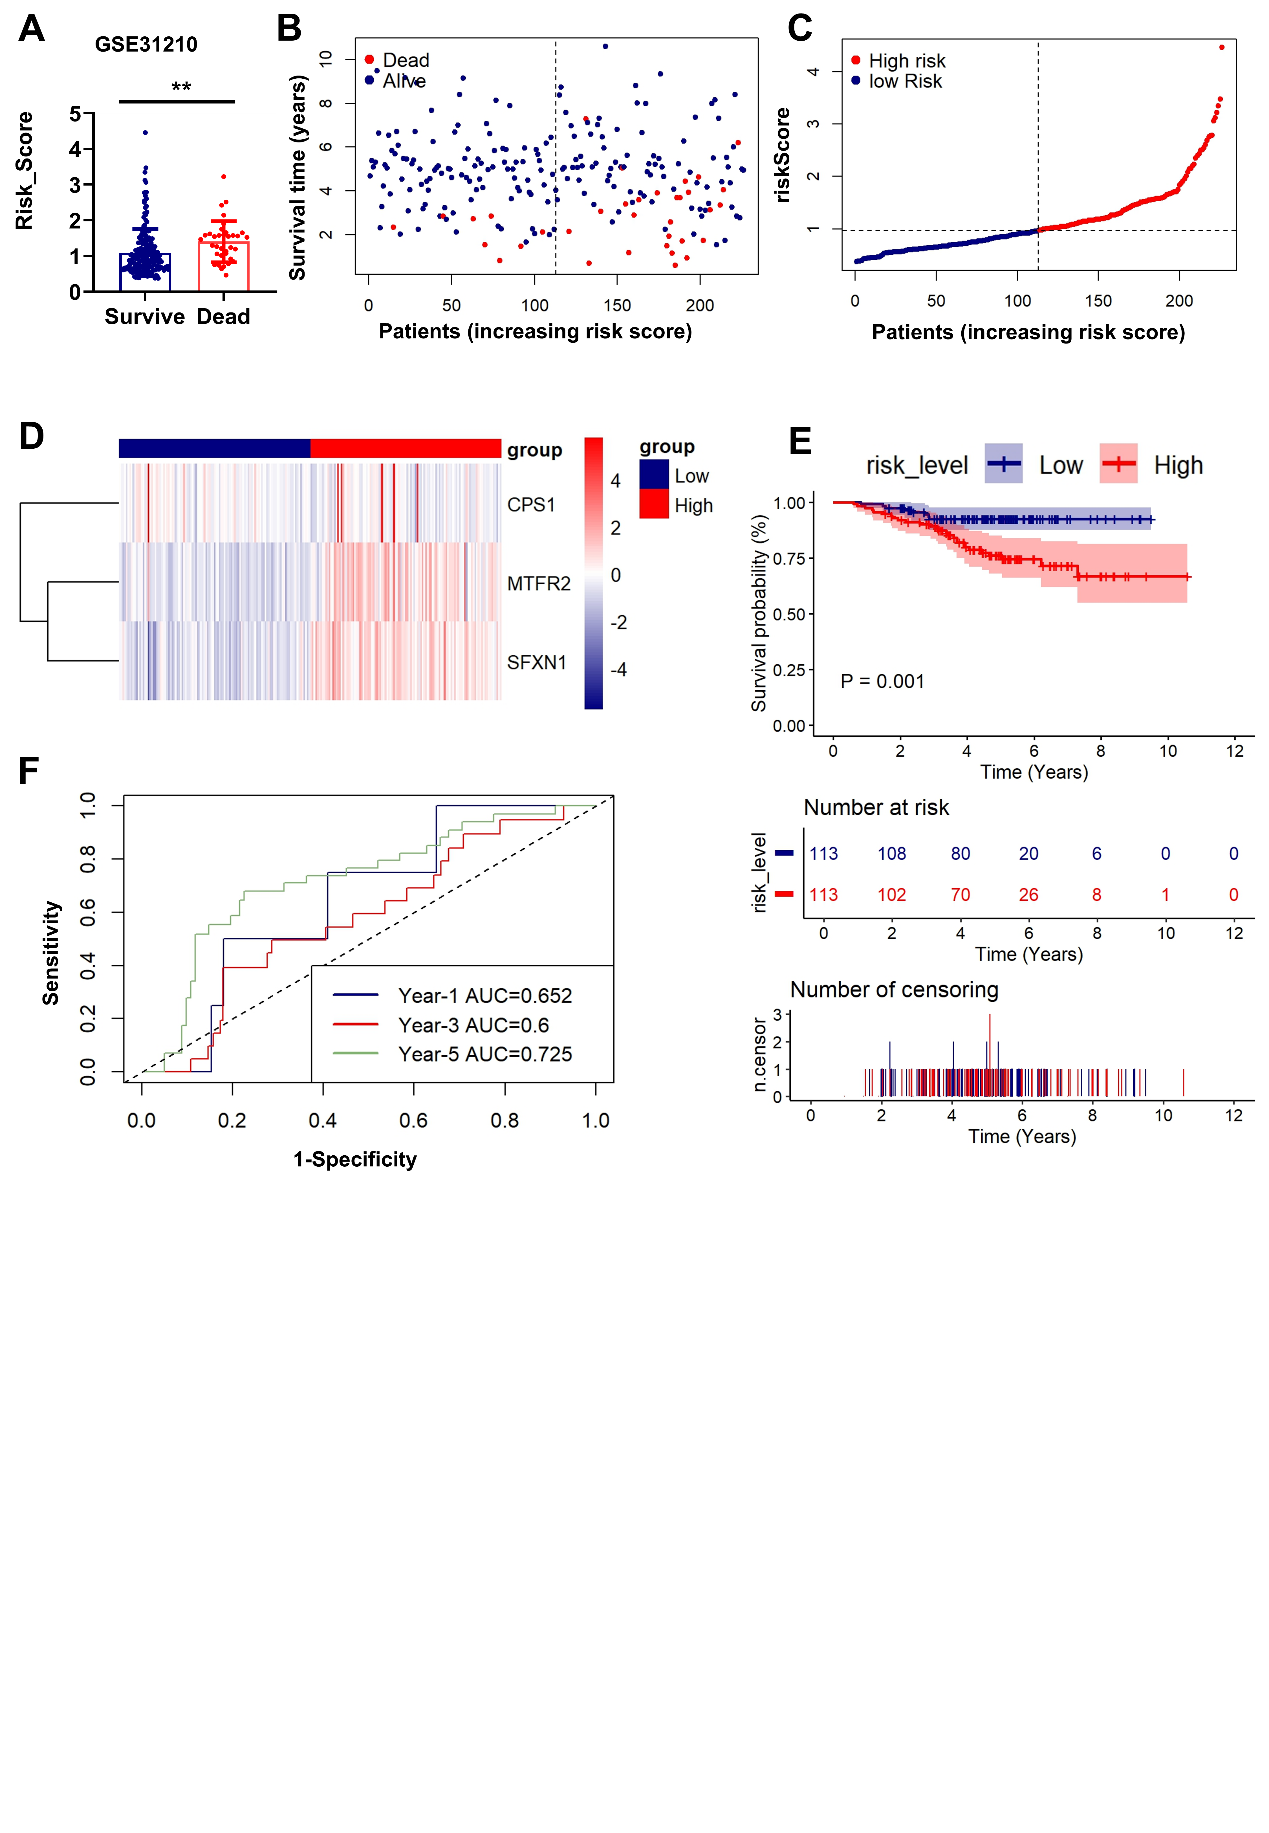


**Fig.** **S3 External validation of the risk stratification model (GSE31210).**

(A) The bar chart compares the risk scores of patients with different prognostic outcomes.

(B) Survival status/time matrix.

(C) Risk score distribution ordered by prognostic value.

(D) Three-gene expression heatmap. Dashed line indicates median risk cutoff.
(E) Kaplan-Meier curves comparing OS between risk subgroups (log-rank *P*=0.001).
(F) Time-dependent ROC curves with AUC values at 1-/3-/5-year intervals.


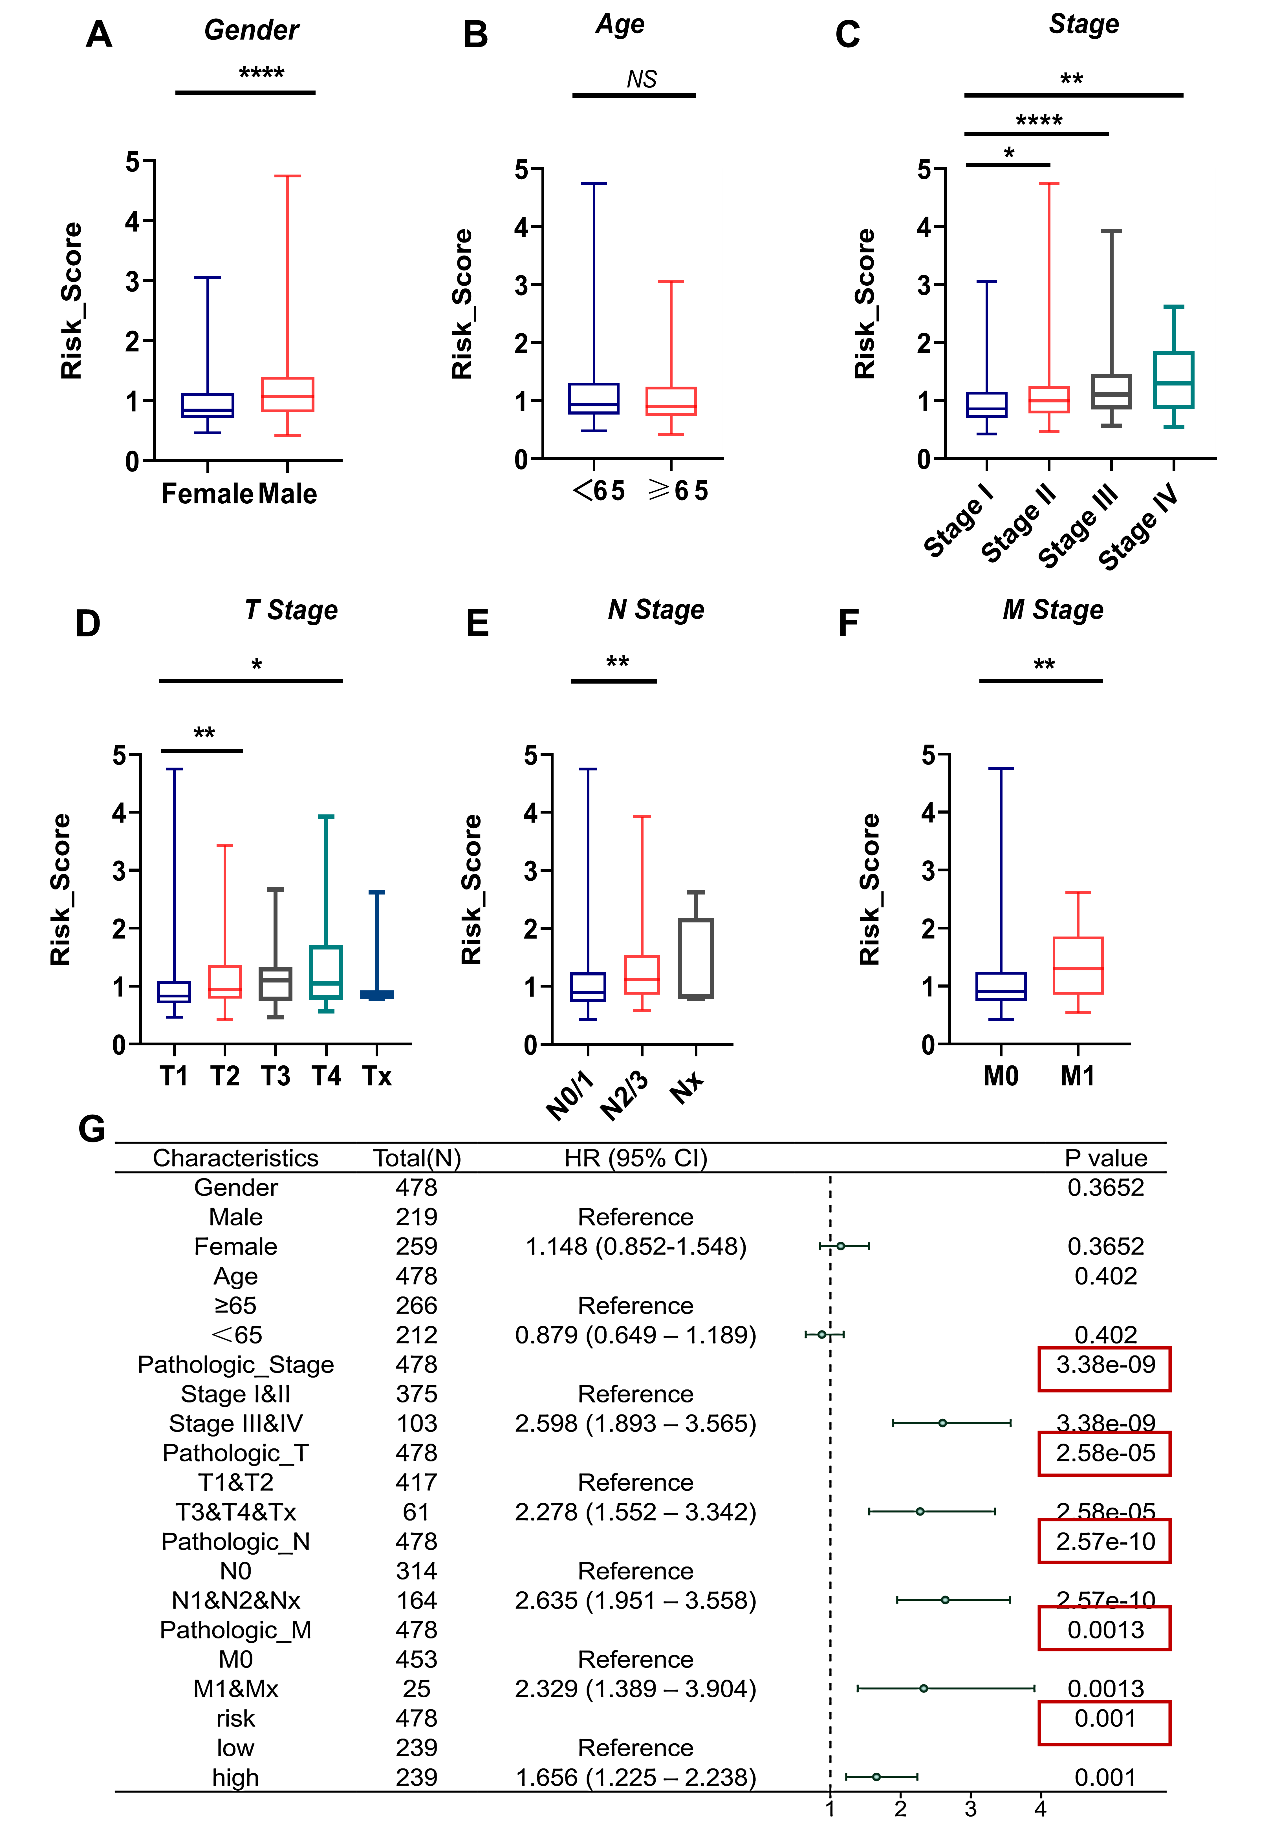


**Fig. S4 Comparative risk score stratification across demographic and pathologic subgroups.**

Horizontal bar plots comparing prognostic risk scores (y-axis: continuous z-score) among:
(A) Gender cohorts (Female vs Male);
(B) Age-stratified groups (<65 vs ≥65 years);
(C) Pathologic stage categories (Stage I vs II vs III vs IV);

(D) Pathologic stage T (T1 vs T2 vs T3 vs T4 vs Tx);

(E) Pathologic stage N (N0/1 vs N2/3 vs Nx);

(F) Pathologic stage M (M0 vs M1);

(G) Forest plots from univariate Cox regression analyses. Red boxes highlight risk score significance. *NS* represents no significance, **P* <0.05, ***P* <0.01, ****P* <0.001, *****P* <0.0001.


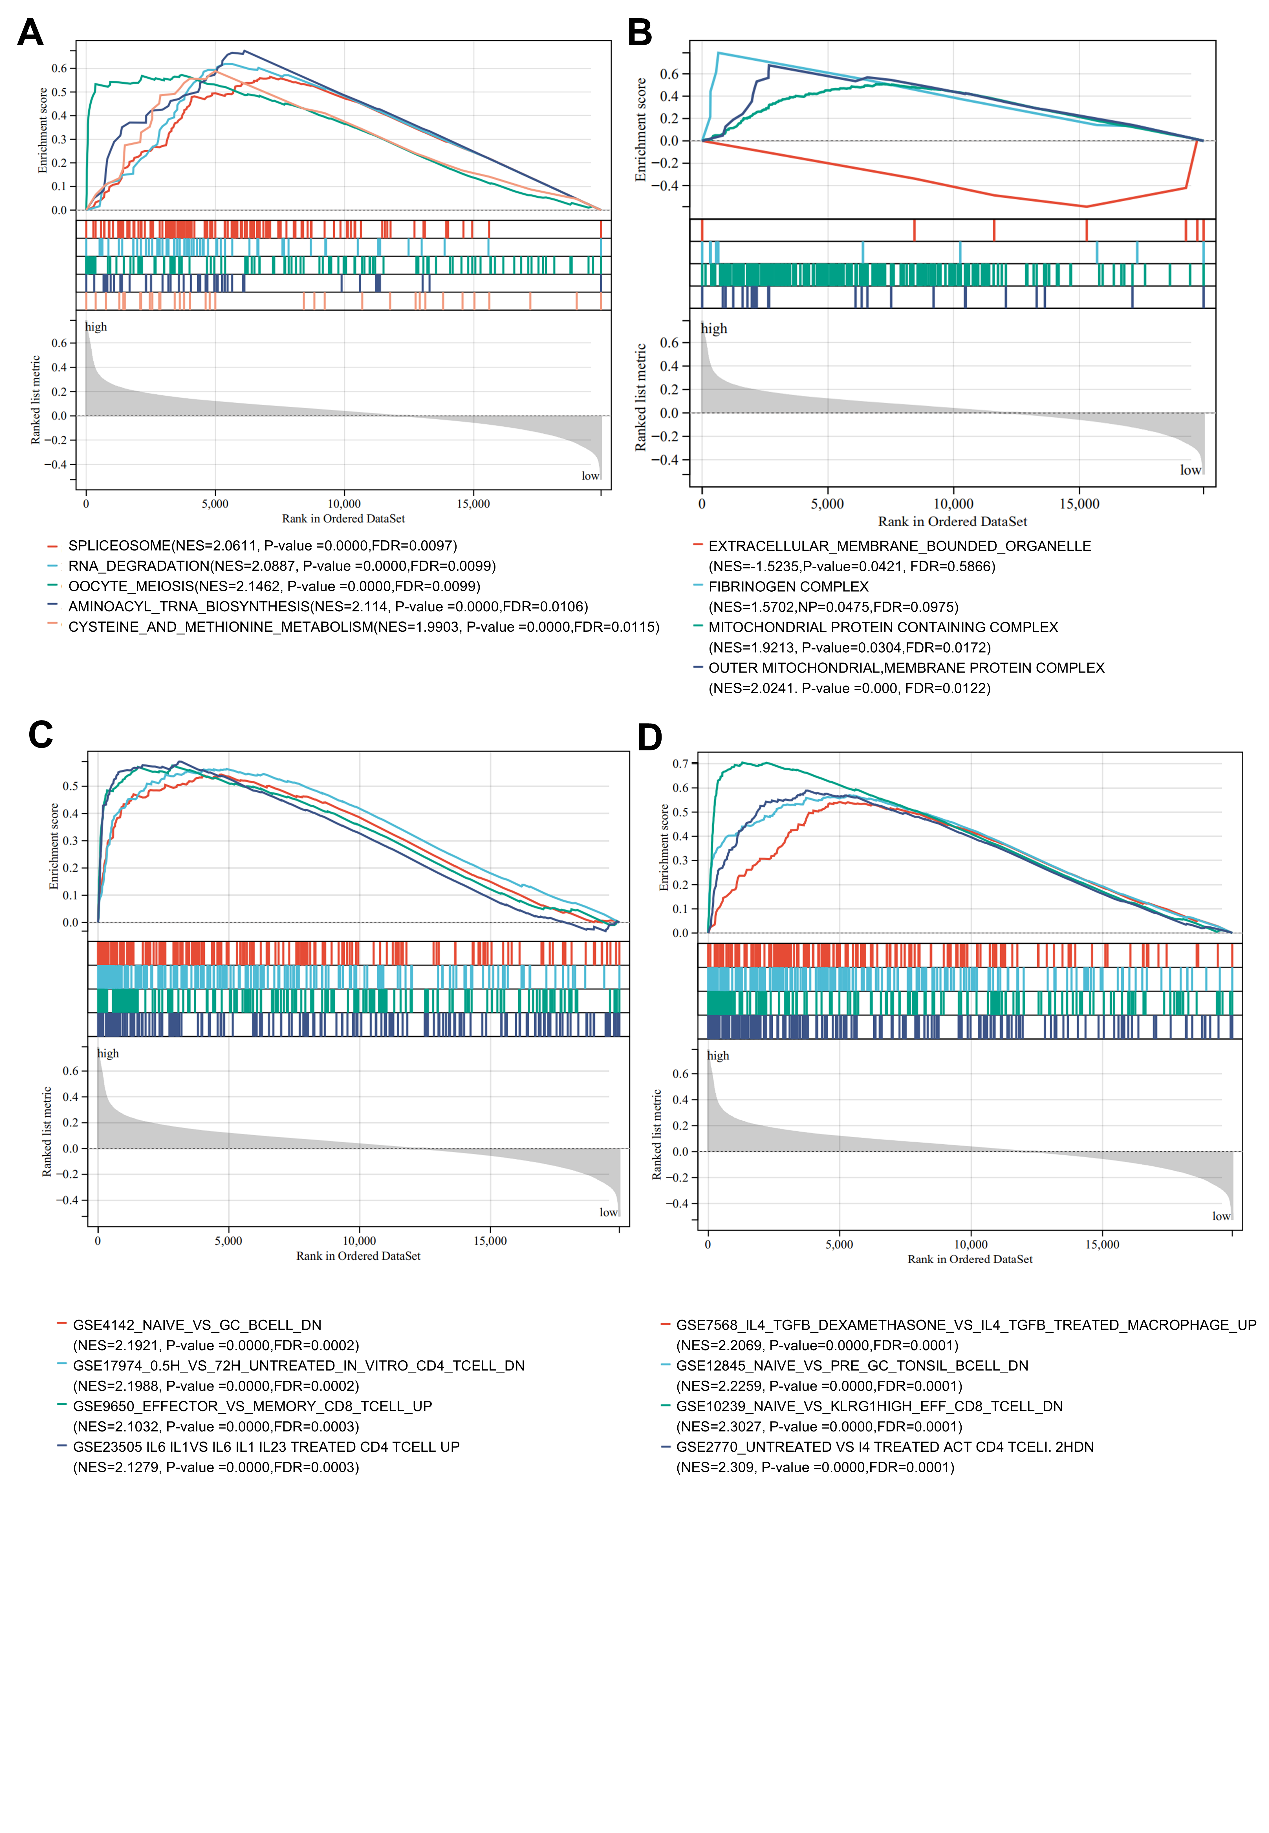


**Fig. S5 Gene Set Enrichment Analysis (GSEA) of risk-associated pathways.**

Enrichment plots from the GSEA. Several pathways and biological processes were differentially enriched in the low- and high-risk groups, including Extracellular Membrane Bounded Organelle, Fibrinogen Complex, Mitochondrial Protein Containing Complex, Outer Mitochondrial Membrane Protein Complex and Immune related pathways; NES, normalized enrichment score; FDR, false discovery rate.


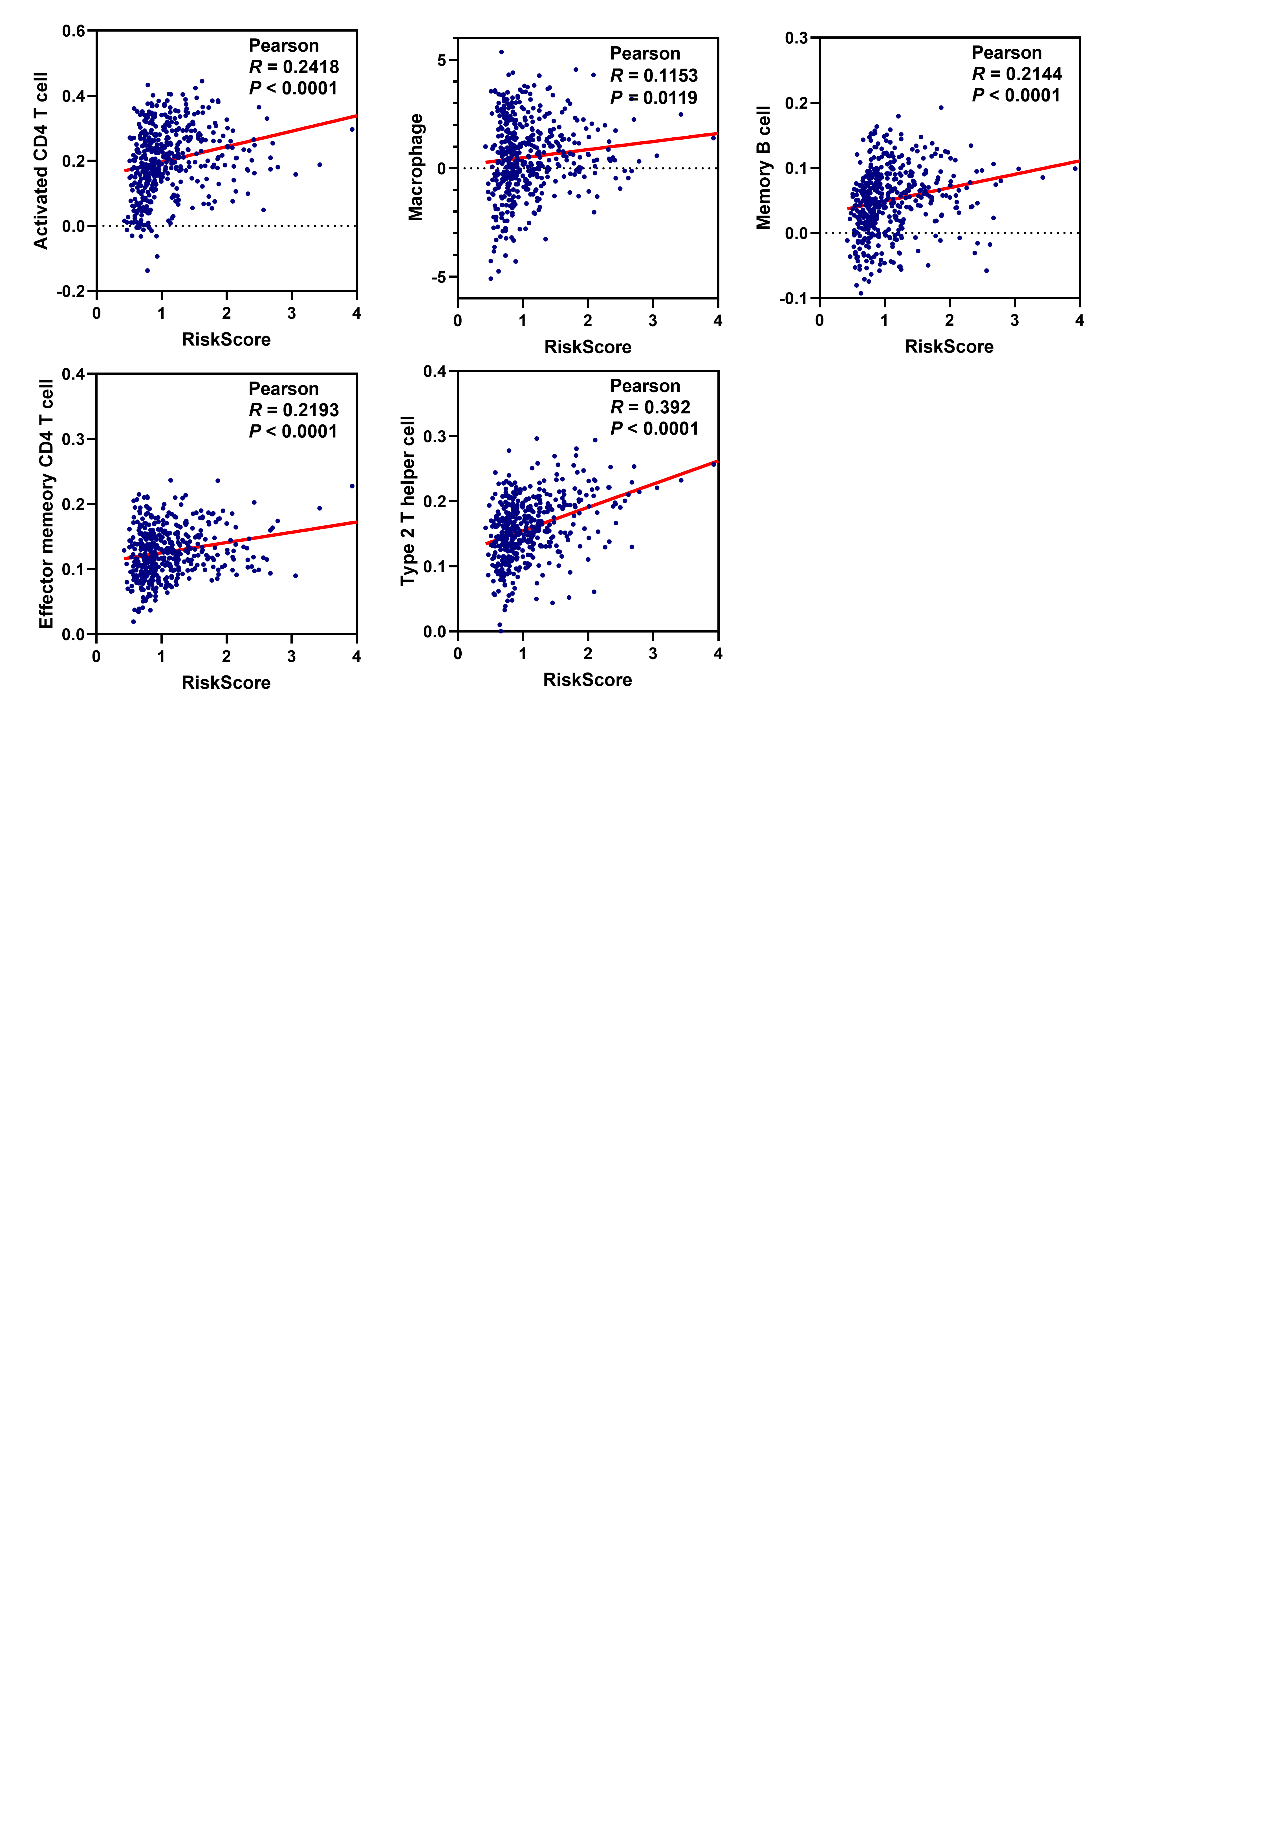


**Fig.S6 Correlation analysis of risk scores and immune cells in LUAD (positive correlation).**

Pearson correlation analysis diagrams and scatter plots indicating correlation between different immune cells infiltration levels and risk scores(positive correlation).


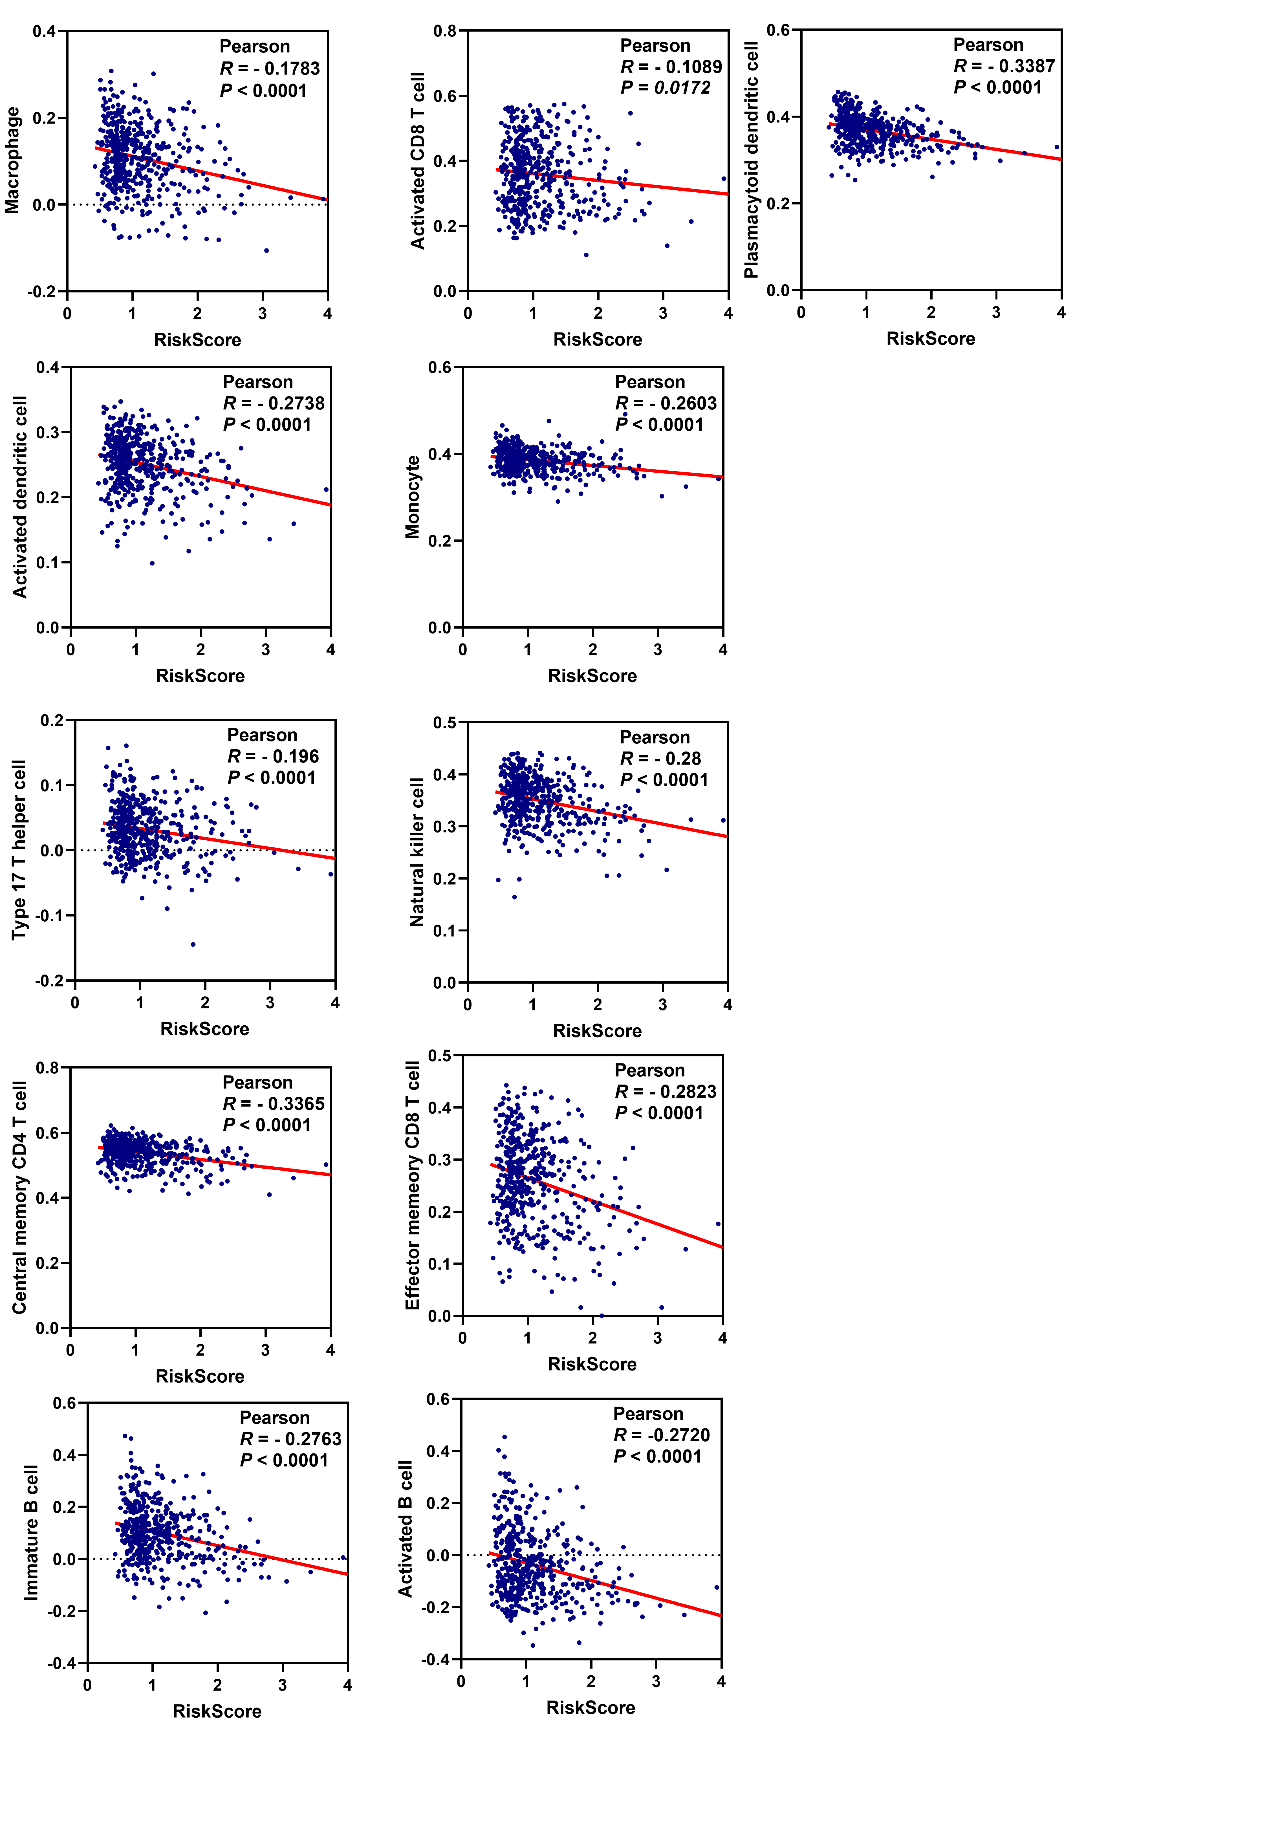
**Fig.S7 Correlation analysis of risk scores and immune cells in LUAD (negative correlation).**

Pearson correlation analysis diagrams and scatter plots indicating correlation between different immune cells infiltration levels and risk scores (negative correlation).


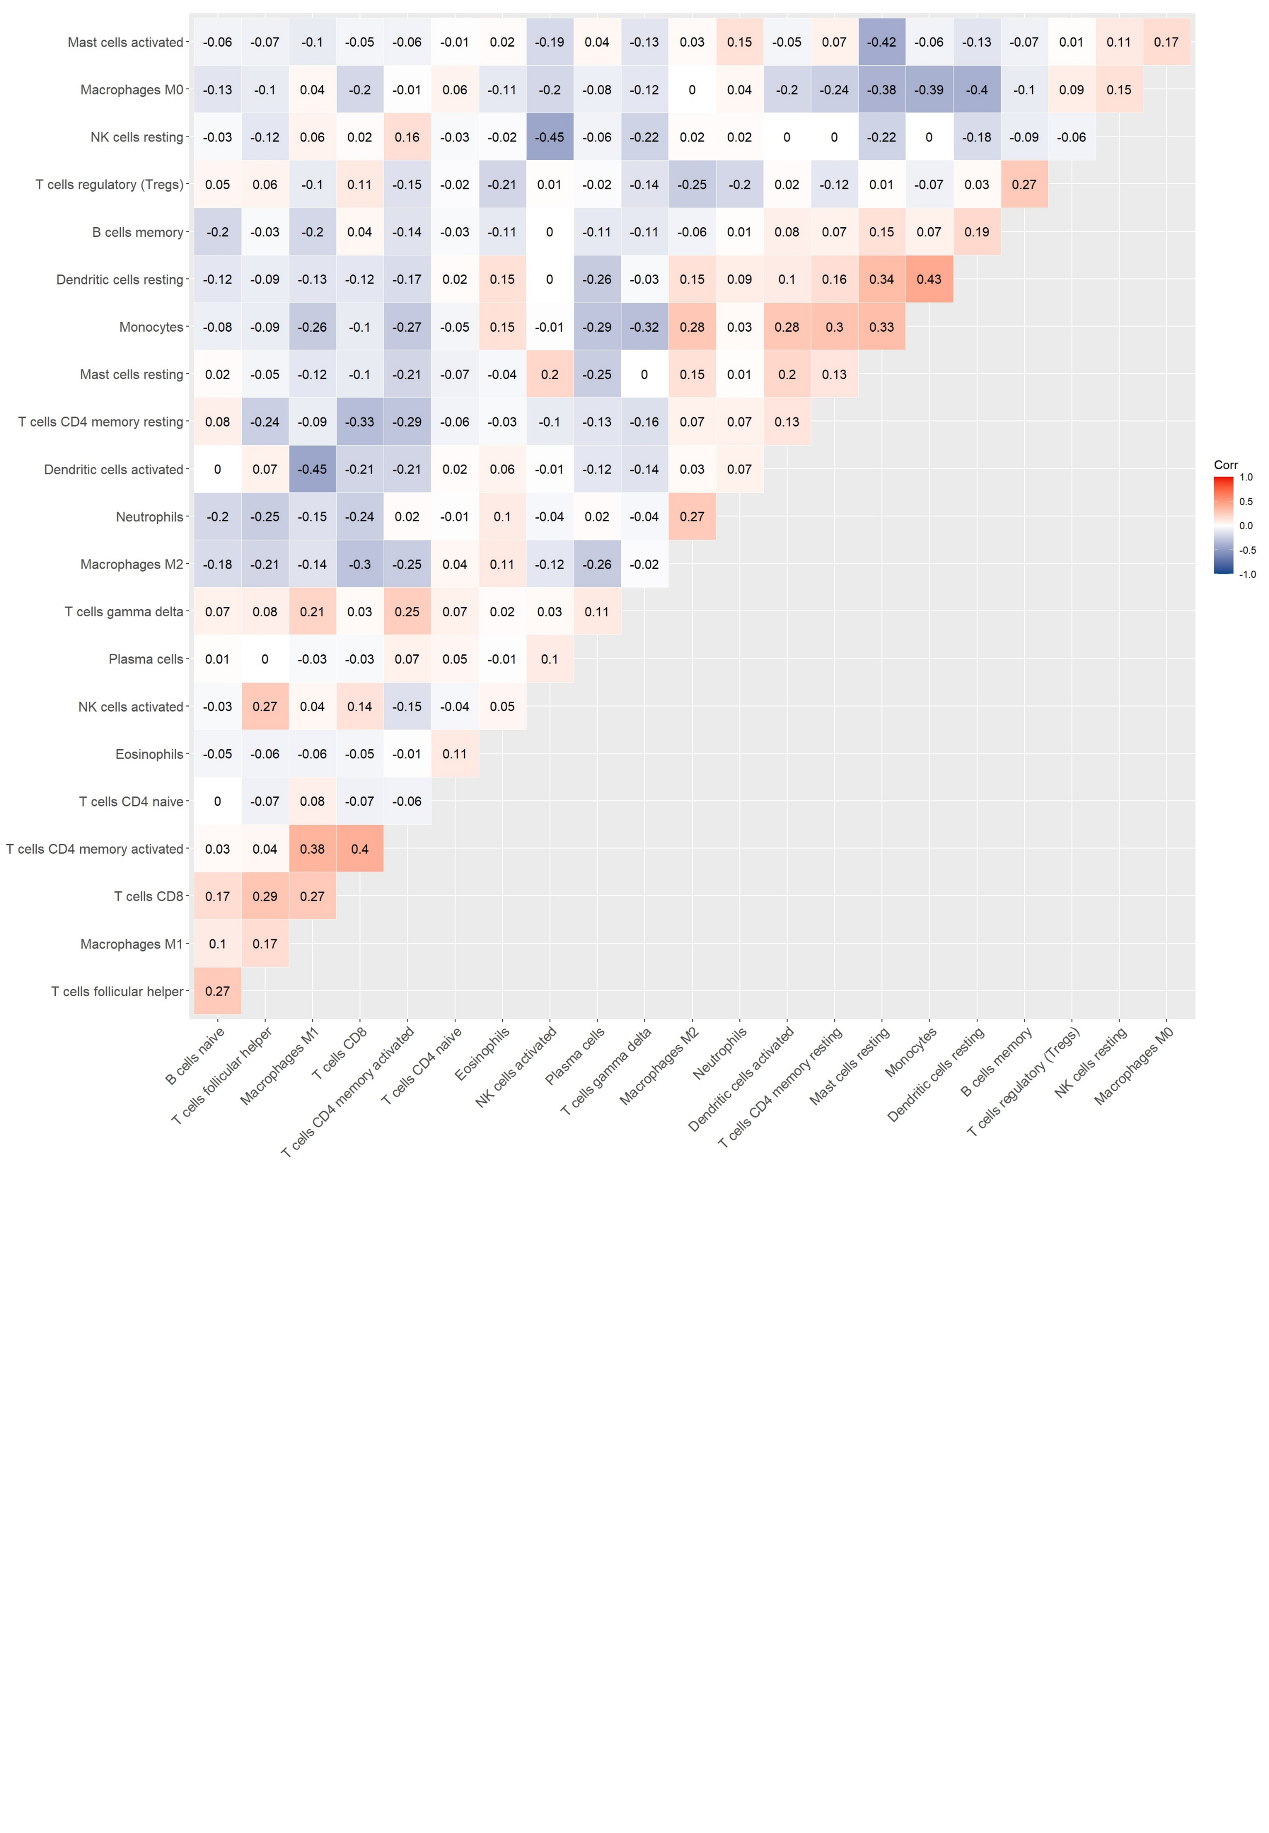


**Fig.S8 Heatmap of correlation analysis.**

Heatmap showing the correlation between 21 kinds of TICs and numeric in each tiny box indicating the *P* value of correlation between two kinds of cells. The shade of each tiny color box represented corresponding correlation value between two cells, and Pearson coefficient was used for significance test.


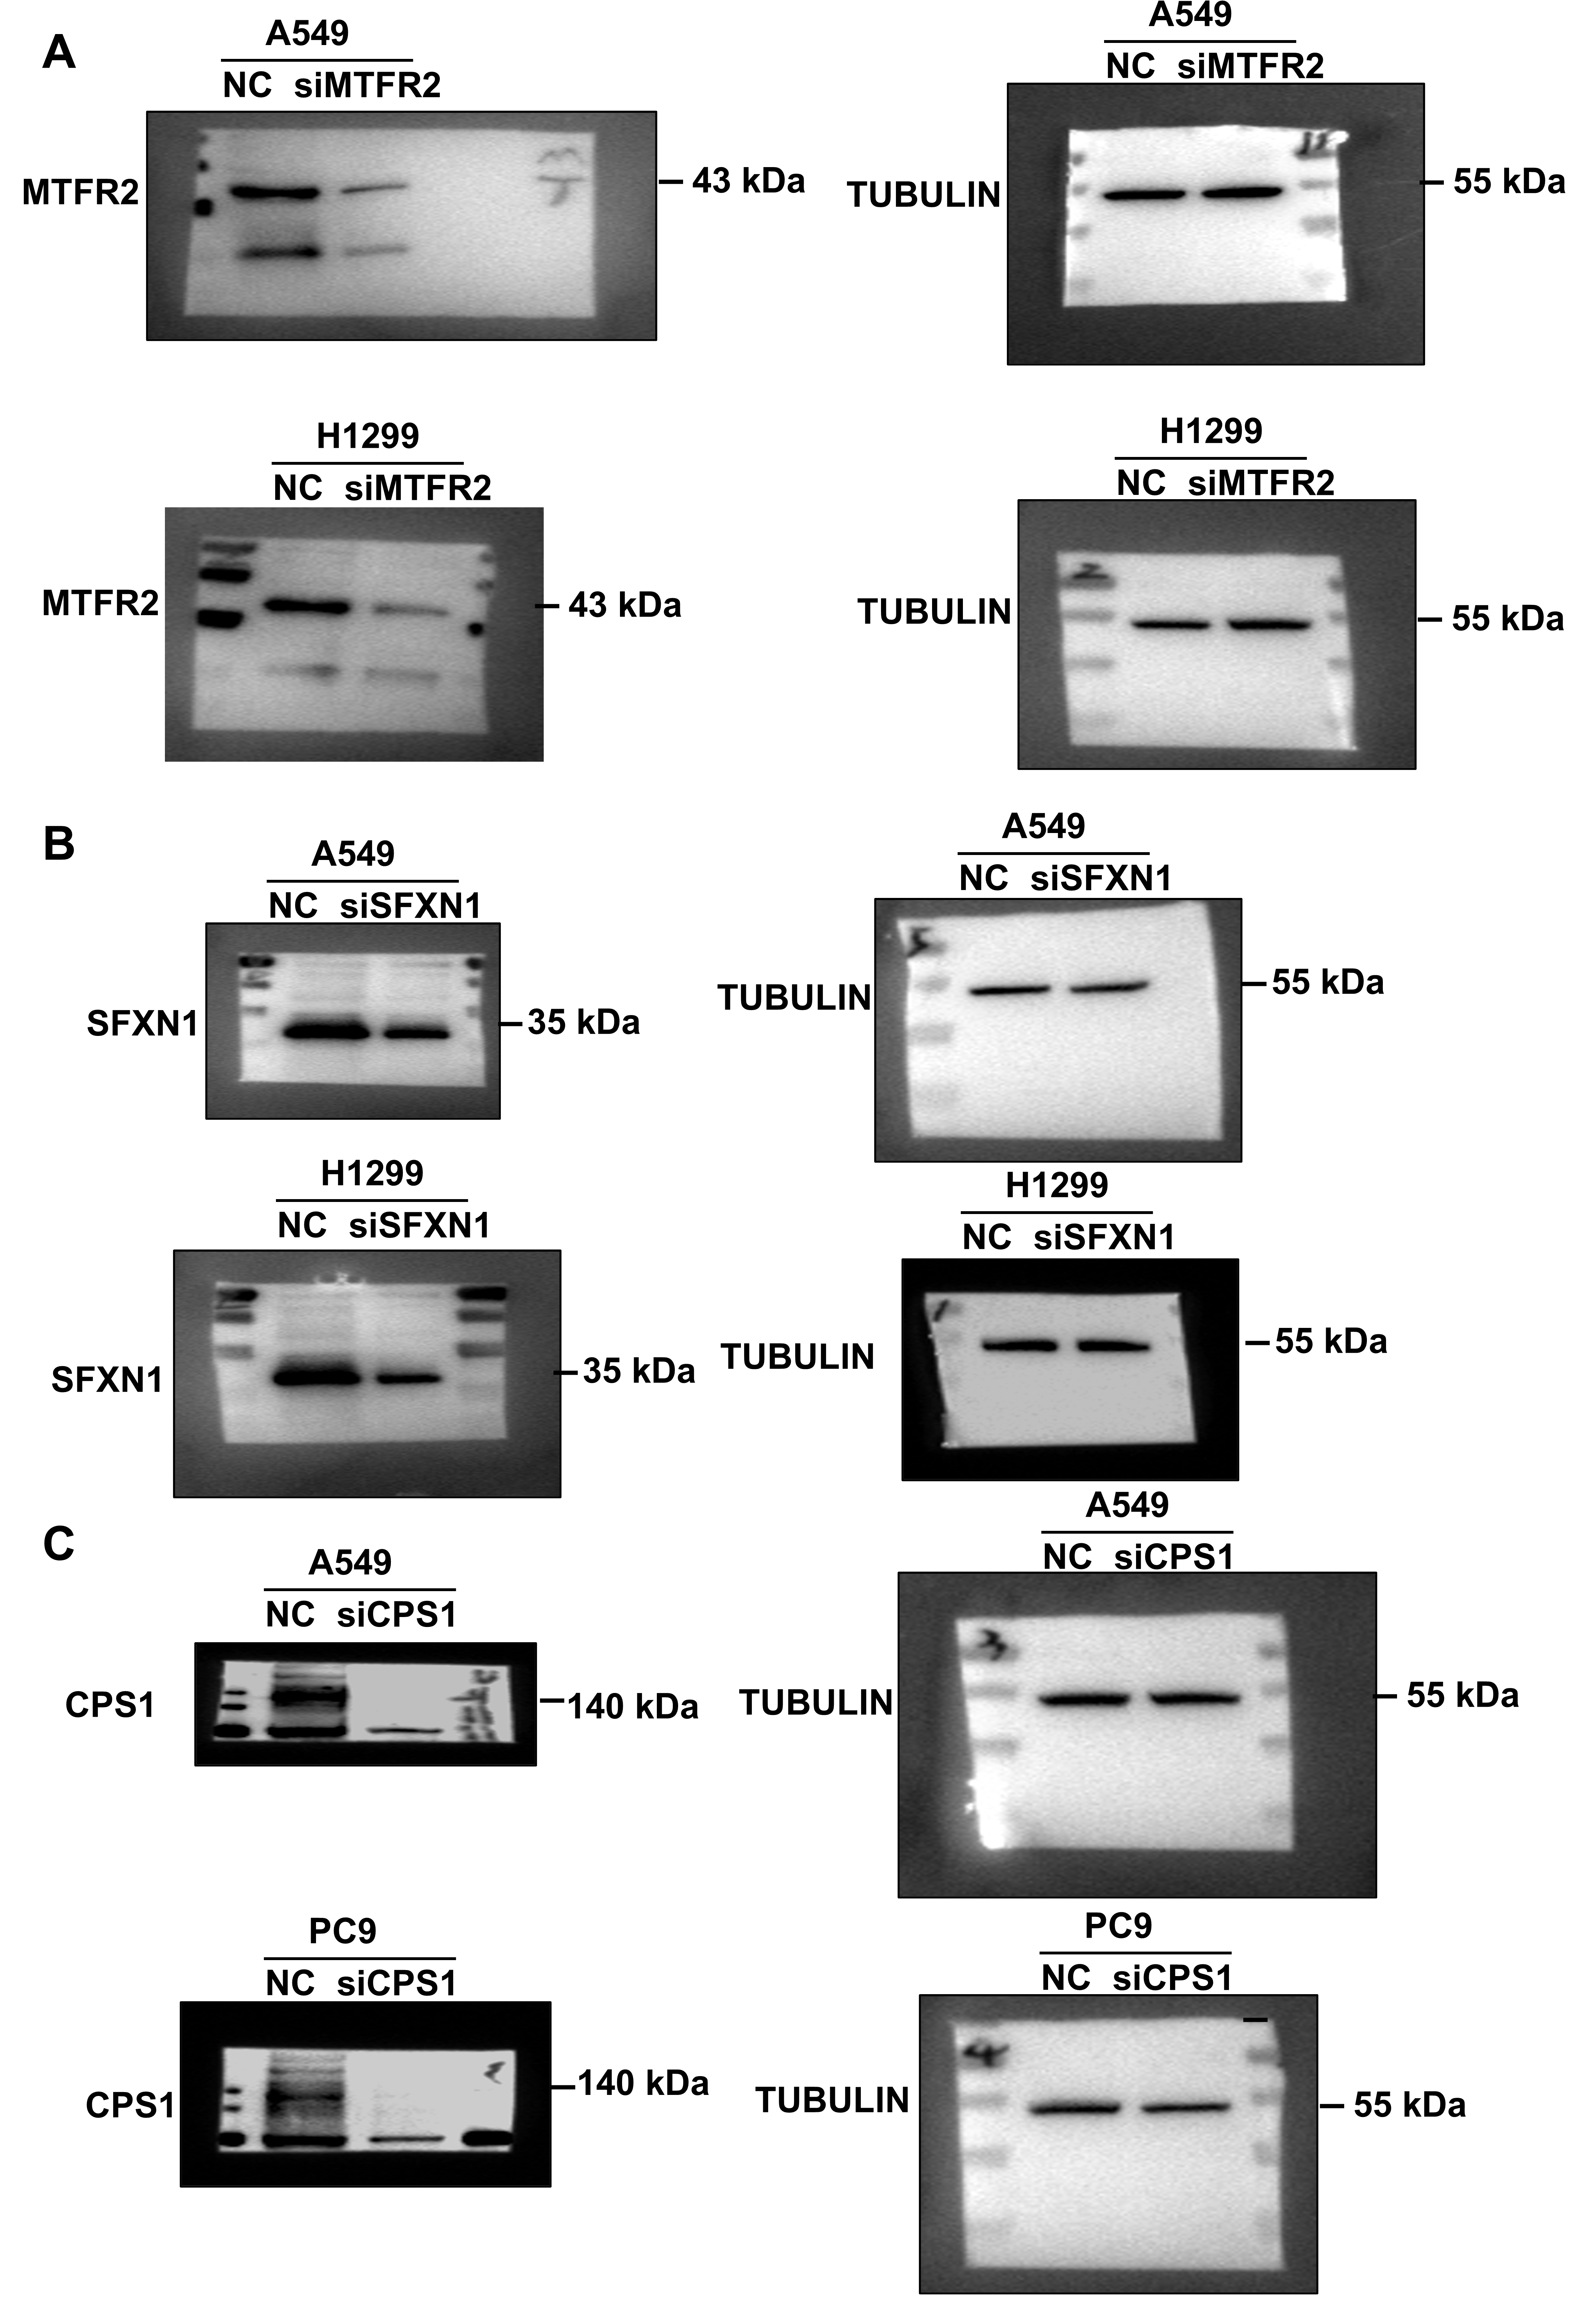


**Fig.S9 Raw bright-field images of Western Blot.**

Raw bright-field images of Western Blot of figure 8.

**Table S1**

| **siRNA** | **siRNA sequence, 5’–3’** | |
| --- | --- | --- |
| **Sense** | **Anti-sense** |
| CPS1 | GCAUUGACCUAGUGAUUAAdTdT | UUAAUCACUAGGUCAAUGCdTdT |
| MTFR2 | GUACAACCAGGAUCUAAUA | UAUUAGAUCCUGGUUGUAC |
| SFXN1 | GCUGCUAAUUGCAUUAAUATT | UAUUAAUGCAAUUAGCAGCTT |

**Table S2**

| **Gene** | **Primer sequence, 5’–3’** | |
| --- | --- | --- |
| **Forward** | **Reverse** |
| CPS1 | CTAGCCTGGATTACATGGTCACC | CCTCAAAGGTACGACCAATAGCC |
| MTFR2 | TGCTTCCACTGGAACCTTGTCG | CGAAATCTGAGATAACTGGCTTCT |
| SFXN1 | ACCAGTCCTTCAATGCCGTCG | GAGTCCTAGAGCTGTTGCTACG |
| ND1 | CACCCAAGAACAGGGTTTGT | TGGCCATGGGTATGTTGTTAA |
| TERT | TCACGGAGACCACGTTTCAAA | TTCAAGTGCTGTCTGATTCCAAT |
