# Supplementary material for: Identification of mitochondrial-related genes to evaluate the immune infiltration and prognosis of lung adenocarcinoma
Source: PeerJ journal article supplement (doi:10.7717/peerj.20262), 2025-11-18
Supplement: S3_code.docx [file S3_code.docx]

setwd("")

library(tidyverse)

install.packages("BiocManager")

library(BiocManager)

install.packages("devtools")

devtools::install_github("BioinformaticsFMRP/TCGAbiolinks")

#BiocManager::install("BioinformaticsFMRP/TCGAbiolinksGUI.data")

#BiocManager::install("remotes")

#BiocManager::install("ExperimentHub")

#BiocManager::install("BioinformaticsFMRP/TCGAbiolinks")

library(TCGAbiolinks)

cancer_type = "TCGA-LUAD"

expquery <- GDCquery(project = cancer_type,

data.category = "Transcriptome Profiling",

data.type = "Gene Expression Quantification",

workflow.type = "STAR - Counts"

)

GDCdownload(expquery,directory = "GDCdata")

expquery2 <- GDCprepare(expquery,directory = "GDCdata",summarizedExperiment = T)

save(expquery2,file = "luad.gdc_2022.rda")

setwd('TCGA-LUAD')

setwd("TCGAdata")

library(tidyverse)

load("luad.gdc_2022.rda")

load("gene_annotation_2022.rda")

table(gene_annotation_2022$type)

counts <- counts %>%

as.data.frame() %>%

rownames_to_column("ENSEMBL") %>%

inner_join(gene_annotation_2022,"ENSEMBL") %>%

.[!duplicated(.$symbol),]

counts1 <- expquery2@assays@data@listData[["unstranded"]]

colnames(counts1) <- expquery2@colData@rownames

rownames(counts1) <- expquery2@rowRanges@ranges@NAMES

counts1 <- as.data.frame(counts1)

counts1 <- rownames_to_column(counts1,var = 'ENSEMBL')

counts1 <- inner_join(counts1,gene_annotation_2022,"ENSEMBL")

counts1 <- counts1[!duplicated(counts1$symbol),]

#a <- c("a","b","a","b","c")

#b <- c("a","b","b","a","c")

#identical(a,b)

identical(colnames(counts),colnames(counts1))

identical(rownames(counts),rownames(counts1))

rownames(counts) <- NULL

counts <- counts %>% column_to_rownames("symbol")

colnames(counts) <- substring(colnames(counts),1,16)

counts <- counts[,!duplicated(colnames(counts))]

table(substring(colnames(counts),14,16))

counts01A <- counts[,substring(colnames(counts),14,16) == c("01A")]

counts11A <- counts[,substring(colnames(counts),14,16) == c("11A")]

table(substring(colnames(counts01A),14,16))

table(substring(colnames(counts11A),14,16))

tpms <- expquery2@assays@data@listData[["tpm_unstrand"]]

colnames(tpms) <- expquery2@colData@rownames

rownames(tpms) <- expquery2@rowRanges@ranges@NAMES

tpms <- tpms %>%

as.data.frame() %>%

rownames_to_column("ENSEMBL") %>%

inner_join(gene_annotation_2022,"ENSEMBL") %>%

.[!duplicated(.$symbol),]

rownames(tpms) <- NULL

tpms <- tpms %>% column_to_rownames("symbol")

tpms <- tpms[tpms$type == "protein_coding",]

tpms <- tpms[,-c(1,ncol(tpms))]

colnames(tpms) <- substring(colnames(tpms),1,16)

tpms <- tpms[,!duplicated(colnames(tpms))]

tpms01A <- tpms[,substring(colnames(tpms),14,16) == c("01A")]

tpms11A <- tpms[,substring(colnames(tpms),14,16) == c("11A")]

write.table(counts01A,"counts01A.txt",sep = "\t",row.names = T,col.names = NA,quote = F)

write.table(counts11A,"counts11A.txt",sep = "\t",row.names = T,col.names = NA,quote = F)

write.table(tpms01A,"tpms01A.txt",sep = "\t",row.names = T,col.names = NA,quote = F)

write.table(tpms11A,"tpms11A.txt",sep = "\t",row.names = T,col.names = NA,quote = F)

counts <- cbind(counts01A,counts11A)

tpms <- cbind(tpms01A,tpms11A)

write.table(counts,"counts.txt",sep = "\t",row.names = T,col.names = NA,quote = F)

write.table(tpms,"tpms.txt",sep = "\t",row.names = T,col.names = NA,quote = F)

range(tpms)

range(tpms01A)

range(tpms11A)

tpms_log2 <- log2(tpms+1)

range(tpms_log2)

tpms01A_log2 <- log2(tpms01A+1)

range(tpms01A_log2)

tpms11A_log2 <- log2(tpms11A+1)

range(tpms11A_log2)

write.table(tpms_log2,"tpms_log2.txt",sep = "\t",row.names = T,col.names = NA,quote = F)

write.table(tpms01A_log2,"tpms01A_log2.txt",sep = "\t",row.names = T,col.names = NA,quote = F)

write.table(tpms11A_log2,"tpms11A_log2.txt",sep = "\t",row.names = T,col.names = NA,quote = F)

setwd("TCGA-LUAD")

setwd("ESTIMATE")

library(utils)

install.packages("estimate", repos=rforge, dependencies=TRUE)

library(estimate)

library(tidyverse)

exp <- read.table("tpms01A_log2.txt",sep = "\t",row.names = 1,check.names = F,stringsAsFactors = F,header = T)

filterCommonGenes(input.f = "tpms01A_log2.txt",

output.f = "tpms01A_log2.gct",

id = "GeneSymbol")

estimateScore("tpms01A_log2.gct",

"tpms01A_log2_estimate_score.txt",

platform="affymetrix")

ESTIMATE_result <- read.table("tpms01A_log2_estimate_score.txt",sep = "\t",row.names = 1,check.names = F,stringsAsFactors = F,header = T)

ESTIMATE_result <- ESTIMATE_result[,-1]

colnames(ESTIMATE_result) <- ESTIMATE_result[1,]

ESTIMATE_result <- as.data.frame(t(ESTIMATE_result[-1,]))

rownames(ESTIMATE_result) <- colnames(exp)

write.table(ESTIMATE_result, file = "ESTIMATE_result.txt",sep = "\t",row.names = T,col.names = NA,quote = F)

setwd("E:/TCGAxunlian/TCGA-LUAD/Survival_data")

setwd("TCGA-LUAD")

setwd("Survival_data")

library(tidyverse)

survival <- survival[,2:3]

survival <- survival %>% rownames_to_column('sample')

survival$name <- paste0(survival$sample,'A')

table(substring(survival$name,14,16))

rownames(survival) <- survival$name

survival <- survival[,2:3]

tpms01A_log2 <- read.table("tpms_log2_01A.txt", sep = "\t",row.names = 1,check.names = F,header = T)

a <- intersect(colnames(exp),rownames(surv))

table(substr(a,14,16))

exp_01A <- tpms01A_log2[,a]

surv_01A <- survival[a,]

tpms01A_log2 <- tpms01A_log2 %>% t() %>% as.data.frame()

identical(rownames(tpms01A_log2),rownames(surv_01A))

exp_surv <- cbind(surv_01A,tpms01A_log2)

write.table(exp_surv,"exp_surv488_01A.txt",sep = "\t",row.names = T,col.names = NA,quote = F)

ESTIMATE_result <- read.table("ESTIMATE_result.txt", sep = "\t",row.names = 1,check.names = F,header = T)

identical(rownames(ESTIMATE_result),rownames(surv_01A))

ESTIMATE_result_surv_01A <- cbind(surv_01A,ESTIMATE_result)

write.table(ESTIMATE_result_surv_01A,"ESTIMATE_result_surv_01A.txt",sep = "\t",row.names = T,col.names = NA,quote = F)

setwd("TCGA-LUAD")

setwd("survival")

surv <- read.table("ESTIMATE_result_surv_01A.txt",sep = "\t",row.names = 1,check.names = F,stringsAsFactors = F,header = T)

surv$OS.time <- surv$OS.time/365

#median

#ImmuneScore

surv$group <- ifelse(surv$ImmuneScore > median(surv$ImmuneScore),"High","Low")

class(surv$group)

surv$group <- factor(surv$group, levels = c("Low","High"))

class(surv$group)

table(surv$group)

#install.packages("survival")

library(survival)

fitd <- survdiff(Surv(OS.time, OS) ~ group,

data = surv,

na.action = na.exclude)

pValue <- 1 - pchisq(fitd$chisq, length(fitd$n) - 1)

fit <- survfit(Surv(OS.time, OS)~ group, data = surv)

summary(fit)

p.lab <- paste0("P", ifelse(pValue < 0.001, " < 0.001", paste0(" = ",round(pValue, 3))))

install.packages("survminer")

library(survminer)

ggsurvplot(fit,

data = surv,

pval = p.lab,

conf.int = TRUE,

risk.table = TRUE,

risk.table.col = "strata",

palette = "jco",

legend.labs = c("Low", "High"),

size = 1,

xlim = c(0,20),

break.time.by = 5,

legend.title = "ImmuneScore",

surv.median.line = "hv",

ylab = "Survival probability (%)",

xlab = "Time (Years)",

ncensor.plot = TRUE,

ncensor.plot.height = 0.25,

risk.table.y.text = FALSE)

dev.off()

surv$group <- ifelse(surv$StromalScore > median(surv$StromalScore),"High","Low")

surv$group <- factor(surv$group, levels = c("Low","High"))

class(surv$group)

table(surv$group)

#install.packages("survival")

library(survival)

fitd <- survdiff(Surv(OS.time, OS) ~ group,

data = surv,

na.action = na.exclude)

pValue <- 1 - pchisq(fitd$chisq, length(fitd$n) - 1)

fit <- survfit(Surv(OS.time, OS)~ group, data = surv)

summary(fit)

p.lab <- paste0("P", ifelse(pValue < 0.001, " < 0.001", paste0(" = ",round(pValue, 3))))

#install.packages("survminer")

library(survminer)

ggsurvplot(fit,

data = surv,

pval = p.lab,

conf.int = TRUE,

risk.table = TRUE,

risk.table.col = "strata",

palette = "jco",

legend.labs = c("Low", "High"),

size = 1,

xlim = c(0,20),

break.time.by = 5,

legend.title = "ESTIMATEScore",

surv.median.line = "hv",

ylab = "Survival probability (%)",

xlab = "Time (Years)",

ncensor.plot = TRUE,

ncensor.plot.height = 0.25,

risk.table.y.text = FALSE)

dev.off()

setwd("clinical")

library(tidyverse)

load("luad.gdc_2022.rda")

clinical <- as.data.frame(expquery2@colData) %>%

.[!duplicated(.$sample),]

class(clinical)

a <-clinical

write.table(clinical,"clinical.txt",sep = "\t",row.names = T,col.names = NA,quote = F)

clinical <-clinical[,c("gender","age_at_index","age_at_diagnosis","vital_status","ajcc_pathologic_stage",

"ajcc_pathologic_t","ajcc_pathologic_n","ajcc_pathologic_m")]

class(clinical$gender)

class(clinical$age_at_index)

class(clinical$ajcc_pathologic_stage)

class(clinical$ajcc_pathologic_t)

class(clinical$ajcc_pathologic_n)

class(clinical$ajcc_pathologic_m)

class(clinical$tissue_or_organ_of_origin)

table(clinical$age_at_diagnosis)

table(clinical$vital_status)

table(clinical$gender)

table(clinical$age_at_index)

table(clinical$ajcc_pathologic_stage)

table(clinical$ajcc_pathologic_t)

table(clinical$ajcc_pathologic_n)

table(clinical$ajcc_pathologic_m)

clinical$ajcc_pathologic_stage <- gsub("A","",clinical$ajcc_pathologic_stage)

clinical$ajcc_pathologic_stage <- gsub("B","",clinical$ajcc_pathologic_stage)

clinical$ajcc_pathologic_t <- gsub("a","",clinical$ajcc_pathologic_t)

clinical$ajcc_pathologic_t <- gsub("b","",clinical$ajcc_pathologic_t)

clinical$ajcc_pathologic_m <- gsub("a","",clinical$ajcc_pathologic_m)

clinical$ajcc_pathologic_m <- gsub("b","",clinical$ajcc_pathologic_m)

rownames(clinical) <- substring(rownames(clinical),1,16)

exp01A <- read.table("tpms01A_log2.txt",sep = "\t",row.names = 1,check.names = F,stringsAsFactors = F,header = T)

clinical01A <- clinical[colnames(exp01A),]

exp01A <- exp01A %>% t() %>% as.data.frame()

identical(rownames(clinical01A),rownames(exp01A))

clinical.expr01A <- cbind(clinical01A,exp01A)

write.table(clinical.expr01A,"clinical.expr01A.txt",sep = "\t",row.names = T,col.names = NA,quote = F)

write.table(clinical,"clinical2.txt",sep = "\t",row.names = T,col.names = NA,quote = F)

clinical_cleandata <- read.table("clinical_cleandata.txt",sep = "\t",row.names = 1,check.names = F,stringsAsFactors = F,header = T)

table(substring(rownames(clinical_cleandata11A),14,16))

clinical_cleandata01A <- clinical_cleandata[substring(rownames(clinical_cleandata),14,16) == c("01A"),]

clinical_cleandata11A <- clinical_cleandata[substring(rownames(clinical_cleandata),14,16) == c("11A"),]

write.table(clinical_cleandata01A,"clinical_cleandata01A.txt",sep = "\t",row.names = T,col.names = NA,quote = F)

write.table(clinical_cleandata11A,"clinical_cleandata11A.txt",sep = "\t",row.names = T,col.names = NA,quote = F)

ESTIMATE_result <- read.table("ESTIMATE_result.txt",sep = "\t",row.names = 1,check.names = F,stringsAsFactors = F,header = T)

identical(rownames(clinical01A),rownames(ESTIMATE_result))

clinical.ESTIMATE_result01A <- cbind(clinical01A,ESTIMATE_result)

write.csv(clinical.ESTIMATE_result01A,file = "clinical.ESTIMATE_result01A.csv")

clinical_cleandata <- read.table("clinical_cleandata.txt",sep = "\t",row.names = 1,check.names = F,stringsAsFactors = F,header = T)

survival

surv <- t(surv)

#as.data.frame

surv <- as.data.frame(surv)

comgene <- intersect(colnames(counts),colnames(surv))

surv <- surv[,comgene]

class(counts)

class(comgene)

clinical_cleandata <- clinical_cleandata[,comgene]

a <- colnames(counts)

b <- colnames(surv)

identical(a,b)

write.table(survival,"survival550.txt",sep = "\t",row.names = T,col.names = NA,quote = F)

write.table(counts,"counts550.txt",sep = "\t",row.names = T,col.names = NA,quote = F)

survival <- read.table("OS.txt",sep = "\t",row.names = 1,check.names = F,stringsAsFactors = F,header = T)

cllinical_surv <- rbind(survival,clinical_cleandata)

write.table(surv,"clinical_surv536.txt",sep = "\t",row.names = T,col.names = NA,quote = F)

library(tidyverse)

#if(!require(DESeq2))BiocManager::install('DESeq2')

library(DESeq2)

counts <- read.table("counts.txt",sep = "\t",row.names = 1,check.names = F,stringsAsFactors = F,header = T)

counts = counts[apply(counts, 1, function(x) sum(x > 1) > 32), ]

conditions=data.frame(sample=colnames(counts),

group=factor(ifelse(substr(colnames(counts),14,16) == "01A","T","N"),levels = c("N","T"))) %>%

column_to_rownames("sample")

dds <- DESeqDataSetFromMatrix(

countData = counts,

colData = conditions,

design = ~ group)

dds <- DESeq(dds)

resultsNames(dds)

res <- results(dds)

save(res,file = "LUAD_DEG.rda")

res_deseq2 <- as.data.frame(res)%>%

arrange(padj) %>%

dplyr::filter(abs(log2FoldChange) > 1, padj < 0.05)

setwd("TCGA-LUAD")

setwd("Immune_DEG")

#setwd("data")

library(BiocManager)

#BiocManager::install('DESeq2')

library(DESeq2)

library(tidyverse)

counts_01A <- read.table("counts01A.txt",sep = "\t",row.names = 1,check.names = F,stringsAsFactors = F,header = T)

estimate <- read.table("SCORE.txt", sep = "\t",row.names = 1,check.names = F,header = T)

x <- "A"

med <- as.numeric(median(estimate[,x]))

estimate <- as.data.frame(t(estimate))

identical(colnames(counts_01A),colnames(estimate))

conditions=data.frame(sample=colnames(counts_01A),

group=factor(ifelse(estimate[x,]>med,"fission","fusion"),levels = c("fusion","fission"))) %>%

column_to_rownames("sample")

#conditions=data.frame(sample=colnames(counts_01A),

# group=factor(ifelse(estimate[x,]>med,"high","low"),levels = c("low","high")))

#conditions <- column_to_rownames(riskscore,"riskScore")

dds <- DESeqDataSetFromMatrix(

countData = counts_01A,

colData = conditions,

design = ~ group)

dds <- DESeq(dds)

resultsNames(dds)

res <- results(dds)

save(res,file="01A478DEG.Rda")

DEG <- as.data.frame(res)

write.table(DEG,"01A478DEG.txt",sep = "\t",row.names = T,col.names = NA,quote = F)

exp <- read.table("tpms_log2_01A.txt",sep = "\t",row.names = 1,check.names = F,stringsAsFactors = F,header = T)

logFC_cutoff <- 1.5

type1 = (DEG$padj < 0.01)&(DEG$log2FoldChange < -logFC_cutoff)

type2 = (DEG$padj < 0.01)&(DEG$log2FoldChange > logFC_cutoff)

DEG$change = ifelse(type1,"DOWN",ifelse(type2,"UP","NOT"))

table(DEG$change)

#install.packages("pheatmap")

library(pheatmap)

a <- filter(DEG,change == 'UP')

b <- filter(DEG,change == 'DOWN')

c <- rbind(a,b)

d <- rownames(c)

exp_diff <- exp[d,]

annotation_col <- conditions

a <- filter(annotation_col,group == 'fission')

b <- filter(annotation_col,group == 'fusion')

exp_diff_fission <- exp_diff[,rownames(a)]

exp_diff_fusion <- exp_diff[,rownames(b)]

exp_diff <- cbind(exp_diff_fusion,exp_diff_fission)

pheatmap(exp_diff,

annotation_col=annotation_col,

annotation_colors =list(group = c("fusion"= "navy", "fission"= "red")),

scale = 'row',

legend_breaks = c(-20,-10,0,10,20),

show_rownames = F,

show_colnames =F,

color = colorRampPalette(c("navy", "white", "red"))(50),

cluster_cols =F,

cluster_rows = T,

fontsize = 8,

fontsize_row=10,

fontsize_col=10)

dev.off()

setwd("TCGA-LUAD")

setwd("Stromal_DEG")

library(BiocManager)

library(DESeq2)

library(tidyverse)

counts_01A <- read.table("counts01A.txt",sep = "\t",row.names = 1,check.names = F,stringsAsFactors = F,header = T)

estimate <- read.table("ESTIMATE_result.txt", sep = "\t",row.names = 1,check.names = F,header = T)

x <- "StromalScore"

med <- as.numeric(median(estimate[,x]))

estimate <- as.data.frame(t(estimate))

identical(colnames(counts_01A),colnames(estimate))

conditions=data.frame(sample=colnames(counts_01A),

group=factor(ifelse(estimate[x,]>med,"high","low"),levels = c("low","high"))) %>%

column_to_rownames("sample")

dds <- DESeqDataSetFromMatrix(

countData = counts_01A,

colData = conditions,

design = ~ group)

dds <- DESeq(dds)

resultsNames(dds)

res <- results(dds)

save(res,file="DEG_StromalScore.Rda")

DEG <- as.data.frame(res)

write.table(DEG,"DEG_StromalScore.txt",sep = "\t",row.names = T,col.names = NA,quote = F)

exp <- read.table("tpms01A_log2.txt",sep = "\t",row.names = 1,check.names = F,stringsAsFactors = F,header = T)

logFC_cutoff <- 1

type1 = (DEG$padj < 0.05)&(DEG$log2FoldChange < -logFC_cutoff)

type2 = (DEG$padj < 0.05)&(DEG$log2FoldChange > logFC_cutoff)

DEG$change = ifelse(type1,"DOWN",ifelse(type2,"UP","NOT"))

table(DEG$change)

library(pheatmap)

a <- filter(DEG,change == 'UP')

b <- filter(DEG,change == 'DOWN')

c <- rbind(a,b)

d <- rownames(c)

exp_diff <- exp[d,]

annotation_col <- conditions

a <- filter(annotation_col,group == 'high')

b <- filter(annotation_col,group == 'low')

exp_diff_high <- exp_diff[,rownames(a)]

exp_diff_low <- exp_diff[,rownames(b)]

exp_diff <- cbind(exp_diff_high,exp_diff_low)

pheatmap(exp_diff,

annotation_col=annotation_col,

scale = "row",

show_rownames = F,

show_colnames =F,

color = colorRampPalette(c("navy", "white", "red"))(50),

cluster_cols =F,

cluster_rows = T,

fontsize = 10,

fontsize_row=3,

fontsize_col=3)

dev.off()

setwd("TCGA-LUAD")

setwd("Immune_Stromal_DEG")

DEG <- as.data.frame(res)

logFC_cutoff <- 1

type1 = (DEG$padj < 0.05)&(DEG$log2FoldChange < -logFC_cutoff)

type2 = (DEG$padj < 0.05)&(DEG$log2FoldChange > logFC_cutoff)

DEG$change = ifelse(type1,"DOWN",ifelse(type2,"UP","NOT"))

table(DEG$change)

library(tidyverse)

a <- filter(DEG,change == 'UP')

b <- filter(DEG,change == 'DOWN')

write.csv(a, file = "Immune_up.csv")

write.csv(b, file = "Immune_down.csv")

DEG <- as.data.frame(res)

logFC_cutoff <- 1

type1 = (DEG$padj < 0.05)&(DEG$log2FoldChange < -logFC_cutoff)

type2 = (DEG$padj < 0.05)&(DEG$log2FoldChange > logFC_cutoff)

DEG$change = ifelse(type1,"DOWN",ifelse(type2,"UP","NOT"))

table(DEG$change)

a <- filter(DEG,change == 'UP')

b <- filter(DEG,change == 'DOWN')

write.csv(a, file = "Stromal_up.csv")

write.csv(b, file = "Stromal_down.csv")

setwd("TCGA-LUAD")

setwd("FUJI_Immune_Stromal_DEG")

library(tidyverse)

library("BiocManager")

BiocManager::install('clusterProfiler')

BiocManager::install('org.Hs.eg.db')

library(org.Hs.eg.db)

library(clusterProfiler)

DEG <- as.data.frame(res)

DEG <- DEG[DEG_final$SYMBOL,]

DEG <- rownames_to_column(DEG,"SYMBOL")

genelist <- bitr(DEG$SYMBOL, fromType="SYMBOL",

toType="ENTREZID", OrgDb='org.Hs.eg.db')

DEG <- inner_join(DEG,genelist,by="SYMBOL")

ego <- enrichGO(gene = DEG$ENTREZID,

OrgDb = org.Hs.eg.db,

ont = "all",

pAdjustMethod = "BH",

minGSSize = 1,

pvalueCutoff =0.05,

qvalueCutoff =0.05,

readable = TRUE)

ego_res <- ego@result

save(ego,ego_res,file = "GO_DEG600_riskscore.Rda")

write.table(ego_res,"GO_DEG600_riskscore.txt",sep = "\t",row.names = T,col.names = NA,quote = F)

kk <- enrichKEGG(gene = DEG$ENTREZID,

organism = 'hsa',

pvalueCutoff = 0.1,

qvalueCutoff =0.1)

kk_res <- kk@result

save(kk,kk_res,file = "KEGG_DEG600_riskscore.Rda")

write.table(kk_res,"KEGG_DEG600_riskscore.txt",sep = "\t",row.names = T,col.names = NA,quote = F)

library(ggnewscale)

library("enrichplot")

#install.packages("ggnewscale")

List = DEG$log2FoldChange

names(List)= DEG$ENTREZID

head(List)

List = sort(List,decreasing = T)

cnetplot(ego, foldChange = List, circular = TRUE, colorEdge = TRUE)

cnetplot(kk, foldChange = List, circular = TRUE, colorEdge = TRUE)

cnetplot(kk, color.params = list(foldChange = your_value) = List, circular = TRUE, color.params = list(edge = your_value) = TRUE)

setwd("E:/TCGAxunlian/TCGA-LUAD/01Acox")

setwd("COX")

#install.packages("survival")

#install.packages("forestplot")

library(survival)

library(forestplot)

library(tidyverse)

exp_surv_01A = read.table("exp_surv_01A.txt",sep = "\t",row.names = 1,check.names = F,stringsAsFactors = F,header = T)

DEG_final = read.table("LUAD_DEG_mito71.txt",sep = "\t",row.names = 1,check.names = F,stringsAsFactors = F,header = T)

DEG_final <- DEG_final %>% rownames_to_column("SYMBOL")

surv.expr <- cbind(exp_surv[,1:2],exp_surv[,DEG_final$SYMBOL])

write.table(surv.expr, file = "surv.expr478.txt",sep = "\t",row.names = T,col.names = NA,quote = F)

surv.expr = read.table("surv.expr478.txt",sep = "\t",row.names = 1,check.names = F,stringsAsFactors = F,header = T)

#a <- exp_surv_01A[,1:2]

#b <- exp_surv_01A[,DEG_final$SYMBOL]

#colnames(surv.expr)[ ] <- ""

Coxoutput <- NULL

for(i in 3:ncol(surv.expr)){

g <- colnames(surv.expr)[i]

cox <- coxph(Surv(OS.time,OS) ~ surv.expr[,i], data = surv.expr)

coxSummary = summary(cox)

Coxoutput <- rbind.data.frame(Coxoutput,

data.frame(gene = g,

HR = as.numeric(coxSummary$coefficients[,"exp(coef)"])[1],

z = as.numeric(coxSummary$coefficients[,"z"])[1],

pvalue = as.numeric(coxSummary$coefficients[,"Pr(>|z|)"])[1],

lower = as.numeric(coxSummary$conf.int[,3][1]),

upper = as.numeric(coxSummary$conf.int[,4][1]),

stringsAsFactors = F),

stringsAsFactors = F)

}

Coxoutput <- arrange(Coxoutput,pvalue)

gene_sig <- Coxoutput[Coxoutput$pvalue < 0.01,]

write.csv(gene_sig, file = "gene_sig_478_5.csv")

topgene <- gene_sig

tabletext <- cbind(c("Gene",topgene$gene),

c("HR",format(round(as.numeric(topgene$HR),3),nsmall = 3)),

c("lower 95%CI",format(round(as.numeric(topgene$lower),3),nsmall = 3)),

c("upper 95%CI",format(round(as.numeric(topgene$upper),3),nsmall = 3)),

c("pvalue",format(round(as.numeric(topgene$p),3),nsmall = 3)))

forestplot(labeltext=tabletext,

mean=c(NA,as.numeric(topgene$HR)),

lower=c(NA,as.numeric(topgene$lower)),

upper=c(NA,as.numeric(topgene$upper)),

graph.pos=5,

graphwidth = unit(.25,"npc"),

fn.ci_norm="fpDrawDiamondCI",

col=fpColors(box="#00A896", lines="#02C39A", zero = "black"),

boxsize=0.2,

lwd.ci=1,

ci.vertices.height = 0.1,ci.vertices=T,

zero=1,

lwd.zero=1.5,

xticks = c(0.5,1,1.5),

lwd.xaxis=2,

xlab="Hazard ratios",

txt_gp=fpTxtGp(label=gpar(cex=1.2),

ticks=gpar(cex=0.85),

xlab=gpar(cex=1),

title=gpar(cex=1.5)),

hrzl_lines=list("1" = gpar(lwd=2, col="black"),

"2" = gpar(lwd=1.5, col="black"),

"5" = gpar(lwd=2, col="black")),

lineheight = unit(.75,"cm"),

colgap = unit(0.3,"cm"),

mar=unit(rep(1.5, times = 4), "cm"),

new_page = F

)

dev.off()

setwd("TCGA-LUAD")

setwd("A")

library(tidyverse)

tpms01A_log2 <- read.table("tpms_log2_01A.txt",sep = "\t",row.names = 1,check.names = F,stringsAsFactors = F,header = T)

tpms11A_log2 <- read.table("tpms_log2_11A.txt",sep = "\t",row.names = 1,check.names = F,stringsAsFactors = F,header = T)

gene <- "CPS1"

a <- tpms01A_log2[gene,]

b <- tpms11A_log2[gene,]

a <- a %>% t() %>% as.data.frame()

b <- b %>% t() %>% as.data.frame()

write.csv(a, file = "CPS1_01A.csv")

write.csv(b, file = "CPS1_11A.csv")

tpms01A_log2 <- tpms01A_log2 %>% t() %>% as.data.frame()

tpms11A_log2 <- tpms11A_log2 %>% t() %>% as.data.frame()

rownames(tpms01A_log2) <- substring(rownames(tpms01A_log2),1,12)

rownames(tpms11A_log2) <- substring(rownames(tpms11A_log2),1,12)

a <- intersect(rownames(tpms01A_log2),rownames(tpms11A_log2))

tpms01A_log2 <- tpms01A_log2[a,]

tpms11A_log2 <- tpms11A_log2[a,]

peidui <- cbind(tpms11A_log2[,gene],tpms01A_log2[,gene])

peidui <- as.data.frame(peidui)

write.csv(peidui,file = "CPS1peidui.csv")

setwd("TCGA-LUAD")

setwd("survival")

surv <- read.table("GSE31210sur_exp_year.txt",sep = "\t",row.names = 1,check.names = F,stringsAsFactors = F,header = T)

surv$OS.time <- surv$OS.time/365

surv <- dat3

surv$group <- ifelse(surv$riskScore > median(surv$riskScore),"High","Low")

class(surv$group)

surv$group <- factor(surv$group, levels = c("Low","High"))

class(surv$group)

table(surv$group)

#install.packages("survival")

library(survival)

fitd <- survdiff(Surv(OS.time, OS) ~ group,

data = surv,

na.action = na.exclude)

pValue <- 1 - pchisq(fitd$chisq, length(fitd$n) - 1)

fit <- survfit(Surv(OS.time, OS)~ group, data = surv)

summary(fit)

p.lab <- paste0("P", ifelse(pValue < 0.001, " < 0.001", paste0(" = ",round(pValue, 3))))

#install.packages("survminer")

library(survminer)

ggsurvplot(fit,

data = surv,

pval = p.lab,

conf.int = TRUE,

risk.table = TRUE,

risk.table.col = "strata",

palette = (c("navy","red")),

legend.labs = c("Low", "High"),

size = 1,

xlim = c(0,20),

break.time.by = 2,

legend.title = "risk_level",

surv.median.line = "hv",

ylab = "Survival probability (%)",

xlab = "Time (Years)",

ncensor.plot = TRUE,

ncensor.plot.height = 0.25,

risk.table.y.text = FALSE)

dev.off()

setwd("TCGA-LUAD")

setwd("A")

library(tidyverse)

clinical.expr01A = read.table("clinical.expr01A.txt",sep = "\t",row.names = 1,check.names = F,stringsAsFactors = F,header = T)

gene <- "A"

clinical_A <- cbind(clinical.expr01A[,1:6],clinical.expr01A[,gene])

write.csv(clinical_A, file = "clinical_A.csv")

setwd("TCGA-LUAD")

setwd("A_DEG")

library(DESeq2)

library(tidyverse)

counts_01A <- read.table("counts01A.txt",sep = "\t",row.names = 1,check.names = F,stringsAsFactors = F,header = T)

exp <- read.table("tpms01A_log2.txt", sep = "\t",row.names = 1,check.names = F,header = T)

identical(colnames(counts_01A),colnames(exp))

gene <- "A"

med=median(as.numeric(exp[gene,]))

conditions=data.frame(sample=colnames(exp),

group=factor(ifelse(exp[gene,]>med,"high","low"),levels = c("low","high"))) %>%

column_to_rownames("sample")

dds <- DESeqDataSetFromMatrix(

countData = counts_01A,

colData = conditions,

design = ~ group)

dds <- DESeq(dds)

resultsNames(dds)

res <- results(dds)

save(res,file="DEG_BTK.Rda")

library(org.Hs.eg.db)

library(clusterProfiler)

DEG <- as.data.frame(res)%>% arrange(padj)

DEG <- DEG %>% rownames_to_column("Gene")

geneList = DEG[,3]

names(geneList) = as.character(DEG[,'Gene'])

head(geneList)

geneList = sort(geneList, decreasing = TRUE)

head(geneList)

msigdb_GMTs <- "msigdb_v7.0_GMTs"

msigdb <- "h.all.v7.0.symbols.gmt"

kegmt <- read.gmt(file.path(msigdb_GMTs,msigdb))

set.seed(1)

gsea <-GSEA(geneList,TERM2GENE = kegmt)

gsea_result_df <- as.data.frame(gsea)

save(gsea,gsea_result_df,file = "GSEA_A_h.all.rda")

library(enrichplot)

gseaplot2(gsea,1,color="red",pvalue_table = T)

#A

gseaplot2(gsea, geneSetID = c(1,2,3,4,5,6,8,10), subplots = 1:3)

#B

gseaplot2(gsea, geneSetID = c(7,9,11,13,14,16,17), subplots = 1:3)

gseaplot2(gsea, geneSetID = 1:10, subplots = 1:3)

dev.off()

msigdb_GMTs <- "msigdb_v7.0_GMTs"

msigdb <- "c7.all.v7.0.symbols.gmt"

kegmt <- read.gmt(file.path(msigdb_GMTs,msigdb))

set.seed(1)

gsea <-GSEA(geneList,TERM2GENE = kegmt)

gsea_result_df <- as.data.frame(gsea)

save(gsea,gsea_result_df,file = "GSEA_A_c7.rda")

#C

gseaplot2(gsea, geneSetID = 1:7, subplots = 1:3)

#D

gseaplot2(gsea,782,color="red",pvalue_table = T)

gseaplot2(gsea, geneSetID = 782, subplots = 1:3)

dev.off()

setwd("TCGA-LUAD")

setwd("A")

BiocManager::install("preprocessCore", version = "3.18")

library(e1071)

library(parallel)

library(preprocessCore)

library(tidyverse)

source("CIBERSORT.R")

sig_matrix <- "LM22.txt"

mixture_file = 'tpms_log2_01A.txt'

#mixture_file <- highexpr

res_cibersort <- CIBERSORT(sig_matrix, mixture_file, perm=100, QN=TRUE)

res_cibersort <- res_cibersort[,1:22]

ciber.res <- res_cibersort[,colSums(res_cibersort) > 0]

ciber.res <- as.data.frame(ciber.res)

write.table(ciber.res,"tpms_log2_01A_lusc_res.txt",sep = "\t",row.names = T,col.names = NA,quote = F)

mycol <- ggplot2::alpha(rainbow(ncol(ciber.res)), 0.7)

par(bty="o", mgp = c(2.5,0.3,0), mar = c(2.1,4.1,2.1,10.1),tcl=-.25,las = 1,xpd = F)

barplot(as.matrix(t(ciber.res)),

border = NA,

names.arg = rep("",nrow(ciber.res)),

yaxt = "n",

ylab = "Relative percentage",

col = mycol)

axis(side = 2, at = c(0,0.2,0.4,0.6,0.8,1),

labels = c("0%","20%","40%","60%","80%","100%"))

legend(par("usr")[2]-20, #

par("usr")[4],

legend = colnames(ciber.res),

xpd = T,

fill = mycol,

cex = 0.7,

border = NA,

y.intersp = 1,

x.intersp = 0.2,

bty = "n")

dev.off()

a <- ciber.res

exp <- read.table("tpms_log2_01A.txt",sep = "\t",row.names = 1,check.names = F,stringsAsFactors = F,header = T)

med=median(as.numeric(exp["MUT",]))

exp <- exp %>% t() %>% as.data.frame()

exp <- exp %>% mutate(group=factor(ifelse(exp$MUT>med,"mutation","wild_type"),levels = c("mutation","wild_type")))

class(exp$group)

identical(rownames(a),rownames(exp))

a$group <- exp$group

a <- a %>% rownames_to_column("sample")

library(ggsci)

library(tidyr)

library(ggpubr)

b <- gather(a,key=CIBERSORT,value = Fraction,-c(group,sample))

ggboxplot(b, x = "CIBERSORT", y = "Fraction",

fill = "group", palette = (c("navy","red")))+

stat_compare_means(aes(group = group),

method = "wilcox.test",

label = "p.signif",

symnum.args=list(cutpoints = c(0, 0.001, 0.01, 0.05, 1),

symbols = c("***", "**", "*", "ns")))+

theme(text = element_text(size=10),

axis.text.x = element_text(angle=45, hjust=1))

dev.off()

install.packages("ggstatsplot")

install.packages("ggcorrplot")

install.packages("corrplot")

library(ggstatsplot)

library(ggcorrplot)

library(corrplot)

cor<-sapply(ciber.res,function(x,y) cor(x,y,method="spearman"),ciber.res)

rownames(cor)<-colnames(ciber.res)

ggcorrplot(cor,

hc.order = TRUE,

type = "upper",

outline.color = "white",

lab = TRUE,

ggtheme = ggplot2::theme_gray,

colors = c("#01468b", "white", "#ee0000"))

exp1 = read.table("tpms_log2_01A_riskscore.txt",sep = "\t",row.names = 1,check.names = F,stringsAsFactors = F,header = T)

exp <- 2^exp1-1

exp <- exp["riskScore",]

ciber = read.table("01A476ciber.res.txt",sep = "\t",row.names = 1,check.names = F,stringsAsFactors = F,header = T)

ciber <- ciber %>% t() %>% as.data.frame()

rownames(ciber) <- gsub(" ",".",rownames(ciber))

identical(colnames(ciber),colnames(exp))

exp_ciber <- rbind(exp,ciber)

exp_ciber <- exp_ciber %>% t() %>% as.data.frame()

#install.packages("ggside")

library(ggstatsplot)

library(ggside)

ggscatterstats(data = exp_ciber,

y = riskScore,

x = T.cells.CD8,

type = "nonparametric",

margins = "both",

xfill = "#01468b",

yfill = "#ee0000",

marginal.type = "densigram")
