# Supplementary material for: Identification of mitochondrial-related genes to evaluate the immune infiltration and prognosis of lung adenocarcinoma
Source: PeerJ journal article supplement (doi:10.7717/peerj.20262), 2025-11-18
Supplement: S4_quantitative_data.xlsx [file S4_quantitative_data.xlsx]

## Sheet: qPCR
Fig.8A
B2B	A549	PC9	H23	H1975	H1299
0.941136	1.99938	1.0297	0.721662	1.19333	2.62394
1.03365	2.15537	1.16602	0.8133	1.29494	2.66472
1.02522	2.28525	1.31869	1.04797	1.41068	2.70133
Fig.8B
B2B	A549	PC9	H23	H1975	H1299
0.978164	3.30062	1.01539	1.62605	2.07835	2.20276
1.02467	3.43168	1.18877	1.73763	2.21163	2.33061
0.997162	3.56771	1.39585	1.86632	2.31002	2.46663
Fig.8C
B2B	A549	PC9	H23	H1975	H1299
1.03384	2.90287	2.73278	1.34656	2.137	0.0152223
0.944789	3.04445	2.86699	1.44769	2.25767	0.107667
1.02137	3.21268	2.96023	1.56575	2.36533	0.217111
Fig.8D
NC	siMTFR2	siSFXN1	siCPS1
0.833024	0.2152	0.215543	0.214877
1.05775	0.2201	0.220346	0.200123
1.10923	0.2247	0.214457	0.224654
Fig.8E
NC	siMTFR2	siSFXN1
0.788412	0.238275	0.229765
1.04177	0.243021	0.234432
1.16982	0.248368	0.239346
Fig.8F
NC	siCPS1
0.922367	0.204988
1.00177	0.209754
1.07587	0.214765
Fig.10C
NC	siMTFR2	siSFXN1	siCPS1
0.905163	0.604765	0.214988	0.340765
1.00191	0.609988	0.219765	0.345432
1.09293	0.614877	0.224765	0.350346

## Sheet: FC
Fig.9B
NC	siCPS1	siMTFR2	siSFXN1
0.88	0.582	1.307	1.64
1	0.5	1.4	1.7
1.12	0.61	1.34	1.6
Fig.9D
NC	siCPS1	siMTFR2	siSFXN1
0.91	1.4	1.35	0.8
1.007	1.5	1.4	0.7
1.083	1.4	1.34	0.79
