# Supplementary material for: Identification of mitochondrial-related genes to evaluate the immune infiltration and prognosis of lung adenocarcinoma
Source: PeerJ journal article supplement (doi:10.7717/peerj.20262), 2025-11-18
Supplement: S6_original_data_of_qPCR.xlsx [file S6_original_data_of_qPCR.xlsx]

## Sheet: fig8(ABC)-1
Color	Position	Sample Name	Gene Name	Cq	Concentration	Call	Excluded	Sample Type	Standard	Cq Mean	Cq Error	Concentration Mean	Concentration Error	Replicate Group	Dye	Edited Call	Failure	Notes	Sample Prep Notes	Number
255;132;197;238	A1	B2B 1	TUBULIN	13.04	-	Positive	Unchecked	Unknown	-	13.04	0	-	-		SYBR Green I		None			1
255;103;103;103	A2	B2B 2	TUBULIN	13.14	-	Positive	Unchecked	Unknown	-	13.14	0	-	-		SYBR Green I		None			2
255;242;138;21	A3	B2B 3	TUBULIN	13.08	-	Positive	Unchecked	Unknown	-	13.08	0	-	-		SYBR Green I		None			3
255;250;215;15	A4	A549 1	TUBULIN	14.15	-	Positive	Unchecked	Unknown	-	14.15	0	-	-		SYBR Green I		None			4
255;103;154;47	A5	A549 2	TUBULIN	14.13	-	Positive	Unchecked	Unknown	-	14.13	0	-	-		SYBR Green I		None			5
255;180;73;149	A6	A549 3	TUBULIN	14.16	-	Positive	Unchecked	Unknown	-	14.16	0	-	-		SYBR Green I		None			6
255;95;103;174	A7	H23 1	TUBULIN	15.01	-	Positive	Unchecked	Unknown	-	15.01	0	-	-		SYBR Green I		None			7
255;205;18;55	A8	H23 2	TUBULIN	14.97	-	Positive	Unchecked	Unknown	-	14.97	0	-	-		SYBR Green I		None			8
255;34;176;146	A9	H23 3	TUBULIN	14.85	-	Positive	Unchecked	Unknown	-	14.85	0	-	-		SYBR Green I		None			9
255;47;73;113	A10	H1299 1	TUBULIN	14	-	Positive	Unchecked	Unknown	-	14	0	-	-		SYBR Green I		None			10
255;234;79;79	A11	H1299 2	TUBULIN	14.05	-	Positive	Unchecked	Unknown	-	14.05	0	-	-		SYBR Green I		None			11
255;66;41;24	A12	H1299 3	TUBULIN	13.99	-	Positive	Unchecked	Unknown	-	13.99	0	-	-		SYBR Green I		None			12
255;66;41;24	B1	B2B 1	TUBULIN	13.04	-	Positive	Unchecked	Unknown	-	13.04	0	-	-		SYBR Green I		None			13
255;132;197;238	B2	B2B 2	TUBULIN	13.17	-	Positive	Unchecked	Unknown	-	13.17	0	-	-		SYBR Green I		None			14
255;103;103;103	B3	B2B 3	TUBULIN	12.97	-	Positive	Unchecked	Unknown	-	12.97	0	-	-		SYBR Green I		None			15
255;242;138;21	B4	A549 1	TUBULIN	14.15	-	Positive	Unchecked	Unknown	-	14.15	0	-	-		SYBR Green I		None			16
255;250;215;15	B5	A549 2	TUBULIN	14.04	-	Positive	Unchecked	Unknown	-	14.04	0	-	-		SYBR Green I		None			17
255;103;154;47	B6	A549 3	TUBULIN	14.07	-	Positive	Unchecked	Unknown	-	14.07	0	-	-		SYBR Green I		None			18
255;180;73;149	B7	H23 1	TUBULIN	14.92	-	Positive	Unchecked	Unknown	-	14.92	0	-	-		SYBR Green I		None			19
255;95;103;174	B8	H23 2	TUBULIN	14.89	-	Positive	Unchecked	Unknown	-	14.89	0	-	-		SYBR Green I		None			20
255;205;18;55	B9	H23 3	TUBULIN	14.83	-	Positive	Unchecked	Unknown	-	14.83	0	-	-		SYBR Green I		None			21
255;34;176;146	B10	H1299 1	TUBULIN	13.9	-	Positive	Unchecked	Unknown	-	13.9	0	-	-		SYBR Green I		None			22
255;47;73;113	B11	H1299 2	TUBULIN	14.03	-	Positive	Unchecked	Unknown	-	14.03	0	-	-		SYBR Green I		None			23
255;234;79;79	B12	H1299 3	TUBULIN	13.82	-	Positive	Unchecked	Unknown	-	13.82	0	-	-		SYBR Green I		None			24
255;234;79;79	C1	B2B 1	MTFR2	18.43	-	Positive	Unchecked	Unknown	-	18.43	0	-	-		SYBR Green I		None			25
255;66;41;24	C2	B2B 2	MTFR2	18.23	-	Positive	Unchecked	Unknown	-	18.23	0	-	-		SYBR Green I		None			26
255;132;197;238	C3	B2B 3	MTFR2	18.32	-	Positive	Unchecked	Unknown	-	18.32	0	-	-		SYBR Green I		None			27
255;103;103;103	C4	A549 1	MTFR2	18.45	-	Positive	Unchecked	Unknown	-	18.45	0	-	-		SYBR Green I		None			28
255;242;138;21	C5	A549 2	MTFR2	18.01	-	Positive	Unchecked	Unknown	-	18.01	0	-	-		SYBR Green I		None			29
255;250;215;15	C6	A549 3	MTFR2	18.22	-	Positive	Unchecked	Unknown	-	18.22	0	-	-		SYBR Green I		None			30
255;103;154;47	C7	H23 1	MTFR2	20.88	-	Positive	Unchecked	Unknown	-	20.88	0	-	-		SYBR Green I		None			31
255;180;73;149	C8	H23 2	MTFR2	20.78	-	Positive	Unchecked	Unknown	-	20.78	0	-	-		SYBR Green I		None			32
255;95;103;174	C9	H23 3	MTFR2	19.89	-	Positive	Unchecked	Unknown	-	19.89	0	-	-		SYBR Green I		None			33
255;205;18;55	C10	H1299 1	MTFR2	17.56	-	Positive	Unchecked	Unknown	-	17.56	0	-	-		SYBR Green I		None			34
255;34;176;146	C11	H1299 2	MTFR2	19.94	-	Positive	Unchecked	Unknown	-	19.94	0	-	-		SYBR Green I		None			35
255;47;73;113	C12	H1299 3	MTFR2	17.46	-	Positive	Unchecked	Unknown	-	17.46	0	-	-		SYBR Green I		None			36
255;47;73;113	D1	B2B 1	MTFR2	18.45	-	Positive	Unchecked	Unknown	-	18.45	0	-	-		SYBR Green I		None			37
255;234;79;79	D2	B2B 2	MTFR2	18.63	-	Positive	Unchecked	Unknown	-	18.63	0	-	-		SYBR Green I		None			38
255;66;41;24	D3	B2B 3	MTFR2	18.29	-	Positive	Unchecked	Unknown	-	18.29	0	-	-		SYBR Green I		None			39
255;132;197;238	D4	A549 1	MTFR2	18.48	-	Positive	Unchecked	Unknown	-	18.48	0	-	-		SYBR Green I		None			40
255;103;103;103	D5	A549 2	MTFR2	18.59	-	Positive	Unchecked	Unknown	-	18.59	0	-	-		SYBR Green I		None			41
255;242;138;21	D6	A549 3	MTFR2	18.25	-	Positive	Unchecked	Unknown	-	18.25	0	-	-		SYBR Green I		None			42
255;250;215;15	D7	H23 1	MTFR2	20.63	-	Positive	Unchecked	Unknown	-	20.63	0	-	-		SYBR Green I		None			43
255;103;154;47	D8	H23 2	MTFR2	20.3	-	Positive	Unchecked	Unknown	-	20.3	0	-	-		SYBR Green I		None			44
255;180;73;149	D9	H23 3	MTFR2	20.29	-	Positive	Unchecked	Unknown	-	20.29	0	-	-		SYBR Green I		None			45
255;95;103;174	D10	H1299 1	MTFR2	18.19	-	Positive	Unchecked	Unknown	-	18.19	0	-	-		SYBR Green I		None			46
255;205;18;55	D11	H1299 2	MTFR2	15.94	-	Positive	Unchecked	Unknown	-	15.94	0	-	-		SYBR Green I		None			47
255;34;176;146	D12	H1299 3	MTFR2	18.11	-	Positive	Unchecked	Unknown	-	18.11	0	-	-		SYBR Green I		None			48
255;34;176;146	E1	B2B 1	SFXN1	18.5	-	Positive	Unchecked	Unknown	-	18.5	0	-	-		SYBR Green I		None			49
255;47;73;113	E2	B2B 2	SFXN1	18.78	-	Positive	Unchecked	Unknown	-	18.78	0	-	-		SYBR Green I		None			50
255;234;79;79	E3	B2B 3	SFXN1	18.02	-	Positive	Unchecked	Unknown	-	18.02	0	-	-		SYBR Green I		None			51
255;66;41;24	E4	A549 1	SFXN1	17.33	-	Positive	Unchecked	Unknown	-	17.33	0	-	-		SYBR Green I		None			52
255;132;197;238	E5	A549 2	SFXN1	17.11	-	Positive	Unchecked	Unknown	-	17.11	0	-	-		SYBR Green I		None			53
255;103;103;103	E6	A549 3	SFXN1	17.65	-	Positive	Unchecked	Unknown	-	17.65	0	-	-		SYBR Green I		None			54
255;242;138;21	E7	H23 1	SFXN1	19.55	-	Positive	Unchecked	Unknown	-	19.55	0	-	-		SYBR Green I		None			55
255;250;215;15	E8	H23 2	SFXN1	19.34	-	Positive	Unchecked	Unknown	-	19.34	0	-	-		SYBR Green I		None			56
255;103;154;47	E9	H23 3	SFXN1	19.19	-	Positive	Unchecked	Unknown	-	19.19	0	-	-		SYBR Green I		None			57
255;180;73;149	E10	H1299 1	SFXN1	17.87	-	Positive	Unchecked	Unknown	-	17.87	0	-	-		SYBR Green I		None			58
255;95;103;174	E11	H1299 2	SFXN1	17.69	-	Positive	Unchecked	Unknown	-	17.69	0	-	-		SYBR Green I		None			59
255;205;18;55	E12	H1299 3	SFXN1	17.72	-	Positive	Unchecked	Unknown	-	17.72	0	-	-		SYBR Green I		None			60
255;205;18;55	F1	B2B 1	SFXN1	17.996	-	Positive	Unchecked	Unknown	-	17.996	0	-	-		SYBR Green I		None			61
255;34;176;146	F2	B2B 2	SFXN1	17.8241	-	Positive	Unchecked	Unknown	-	17.8241	0	-	-		SYBR Green I		None			62
255;47;73;113	F3	B2B 3	SFXN1	18.3983	-	Positive	Unchecked	Unknown	-	18.3983	0	-	-		SYBR Green I		None			63
255;234;79;79	F4	A549 1	SFXN1	17.8817	-	Positive	Unchecked	Unknown	-	17.8817	0	-	-		SYBR Green I		None			64
255;66;41;24	F5	A549 2	SFXN1	17.8667	-	Positive	Unchecked	Unknown	-	17.8667	0	-	-		SYBR Green I		None			65
255;132;197;238	F6	A549 3	SFXN1	17.2698	-	Positive	Unchecked	Unknown	-	17.2698	0	-	-		SYBR Green I		None			66
255;103;103;103	F7	H23 1	SFXN1	19.3413	-	Positive	Unchecked	Unknown	-	19.3413	0	-	-		SYBR Green I		None			67
255;242;138;21	F8	H23 2	SFXN1	19.2759	-	Positive	Unchecked	Unknown	-	19.2759	0	-	-		SYBR Green I		None			68
255;250;215;15	F9	H23 3	SFXN1	19.0491	-	Positive	Unchecked	Unknown	-	19.0491	0	-	-		SYBR Green I		None			69
255;103;154;47	F10	H1299 1	SFXN1	18.1119	-	Positive	Unchecked	Unknown	-	18.1119	0	-	-		SYBR Green I		None			70
255;180;73;149	F11	H1299 2	SFXN1	18.3034	-	Positive	Unchecked	Unknown	-	18.3034	0	-	-		SYBR Green I		None			71
255;95;103;174	F12	H1299 3	SFXN1	17.842	-	Positive	Unchecked	Unknown	-	17.842	0	-	-		SYBR Green I		None			72
255;95;103;174	G1	B2B 1	CPS1	20.54	-	Positive	Unchecked	Unknown	-	20.54	0	-	-		SYBR Green I		None			73
255;205;18;55	G2	B2B 2	CPS1	20.69	-	Positive	Unchecked	Unknown	-	20.69	0	-	-		SYBR Green I		None			74
255;34;176;146	G3	B2B 3	CPS1	20.66	-	Positive	Unchecked	Unknown	-	20.66	0	-	-		SYBR Green I		None			75
255;47;73;113	G4	A549 1	CPS1	20.21	-	Positive	Unchecked	Unknown	-	20.21	0	-	-		SYBR Green I		None			76
255;234;79;79	G5	A549 2	CPS1	20.23	-	Positive	Unchecked	Unknown	-	20.23	0	-	-		SYBR Green I		None			77
255;66;41;24	G6	A549 3	CPS1	20.12	-	Positive	Unchecked	Unknown	-	20.12	0	-	-		SYBR Green I		None			78
255;132;197;238	G7	H23 1	CPS1	22.31	-	Positive	Unchecked	Unknown	-	22.31	0	-	-		SYBR Green I		None			79
255;103;103;103	G8	H23 2	CPS1	22.14	-	Positive	Unchecked	Unknown	-	22.14	0	-	-		SYBR Green I		None			80
255;242;138;21	G9	H23 3	CPS1	22.01	-	Positive	Unchecked	Unknown	-	22.01	0	-	-		SYBR Green I		None			81
255;250;215;15	G10	H1299 1	CPS1	27.61	-	Positive	Unchecked	Unknown	-	27.61	0	-	-		SYBR Green I		None			82
255;103;154;47	G11	H1299 2	CPS1	24.63	-	Positive	Unchecked	Unknown	-	24.63	0	-	-		SYBR Green I		None			83
255;180;73;149	G12	H1299 3	CPS1	24.01	-	Positive	Unchecked	Unknown	-	24.01	0	-	-		SYBR Green I		None			84
255;180;73;149	H1	B2B 1	CPS1	20.9188	-	Positive	Unchecked	Unknown	-	20.9188	0	-	-		SYBR Green I		None			85
255;95;103;174	H2	B2B 2	CPS1	21.271	-	Positive	Unchecked	Unknown	-	21.271	0	-	-		SYBR Green I		None			86
255;205;18;55	H3	B2B 3	CPS1	20.8117	-	Positive	Unchecked	Unknown	-	20.8117	0	-	-		SYBR Green I		None			87
255;34;176;146	H4	A549 1	CPS1	20.4948	-	Positive	Unchecked	Unknown	-	20.4948	0	-	-		SYBR Green I		None			88
255;47;73;113	H5	A549 2	CPS1	20.2148	-	Positive	Unchecked	Unknown	-	20.2148	0	-	-		SYBR Green I		None			89
255;234;79;79	H6	A549 3	CPS1	20.2248	-	Positive	Unchecked	Unknown	-	20.2248	0	-	-		SYBR Green I		None			90
255;66;41;24	H7	H23 1	CPS1	22.2481	-	Positive	Unchecked	Unknown	-	22.2481	0	-	-		SYBR Green I		None			91
255;132;197;238	H8	H23 2	CPS1	22.1253	-	Positive	Unchecked	Unknown	-	22.1253	0	-	-		SYBR Green I		None			92
255;103;103;103	H9	H23 3	CPS1	21.8584	-	Positive	Unchecked	Unknown	-	21.8584	0	-	-		SYBR Green I		None			93
255;242;138;21	H10	H1299 1	CPS1	27.8485	-	Positive	Unchecked	Unknown	-	27.8485	0	-	-		SYBR Green I		None			94
255;250;215;15	H11	H1299 2	CPS1	25.3582	-	Positive	Unchecked	Unknown	-	25.3582	0	-	-		SYBR Green I		None			95
255;103;154;47	H12	H1299 3	CPS1	23.6867	-	Positive	Unchecked	Unknown	-	23.6867	0	-	-		SYBR Green I		None			96

## Sheet: fig8D(A549)
Well	Sample Name	Target Name	Task	Reporter	Quencher	RQ	RQ Min	RQ Max	Cт	Cт Mean	Cт SD	ΔCт	ΔCт Mean	ΔCт SE	HK Control ΔCт Mean	HK Control ΔCт SE	ΔΔCт	Automatic Ct Threshold	Ct Threshold	Automatic Baseline	Baseline Start	Baseline End	Efficiency	Tm1	Tm2	Tm3	Comments	HIGHSD
A1	NC	ACTB	UNKNOWN	SYBR	None				15.797	15.797								TRUE	0.040429	TRUE	3	13	1					N
A2	NC	ACTB	UNKNOWN	SYBR	None				15.875	15.875								TRUE	0.040429	TRUE	3	13	1					N
A3	NC	ACTB	UNKNOWN	SYBR	None				15.875	15.875								TRUE	0.040429	TRUE	3	13	1					N
A4	siMTFR2	ACTB	UNKNOWN	SYBR	None				15.6439	15.6439								TRUE	0.040429	TRUE	3	13	1					N
A5	siMTFR2	ACTB	UNKNOWN	SYBR	None				15.5937	15.5937								TRUE	0.040429	TRUE	3	13	1					N
A6	siMTFR2	ACTB	UNKNOWN	SYBR	None				15.6439	15.6439								TRUE	0.040429	TRUE	3	13	1					N
A7	siSFXN1	ACTB	UNKNOWN	SYBR	None				15.5017	15.5017								TRUE	0.040429	TRUE	3	13	1					N
A8	siSFXN1	ACTB	UNKNOWN	SYBR	None				15.4835	15.4835								TRUE	0.040429	TRUE	3	13	1					N
A9	siSFXN1	ACTB	UNKNOWN	SYBR	None				15.5017	15.5017								TRUE	0.040429	TRUE	3	13	1					N
A10	siCPS1	ACTB	UNKNOWN	SYBR	None				16.153	16.153								TRUE	0.040429	TRUE	3	13	1					N
A11	siCPS1	ACTB	UNKNOWN	SYBR	None				16.0163	16.0163								TRUE	0.040429	TRUE	3	13	1					N
A12	siCPS1	ACTB	UNKNOWN	SYBR	None				16.153	16.153								TRUE	0.040429	TRUE	3	13	1					N
B1	NC	ACTB	UNKNOWN	SYBR	None				15.9271	15.9271								TRUE	0.040429	TRUE	3	13	1					N
B2	NC	ACTB	UNKNOWN	SYBR	None				15.7792	15.7792								TRUE	0.040429	TRUE	3	13	1					N
B3	NC	ACTB	UNKNOWN	SYBR	None				15.797	15.797								TRUE	0.040429	TRUE	3	13	1					N
B4	siMTFR2	ACTB	UNKNOWN	SYBR	None				15.7628	15.7628								TRUE	0.040429	TRUE	3	13	1					N
B5	siMTFR2	ACTB	UNKNOWN	SYBR	None				15.7467	15.7467								TRUE	0.040429	TRUE	3	13	1					N
B6	siMTFR2	ACTB	UNKNOWN	SYBR	None				15.7467	15.7467								TRUE	0.040429	TRUE	3	13	1					N
B7	siSFXN1	ACTB	UNKNOWN	SYBR	None				15.8399	15.8399								TRUE	0.040429	TRUE	3	13	1					N
B8	siSFXN1	ACTB	UNKNOWN	SYBR	None				15.9379	15.9379								TRUE	0.040429	TRUE	3	13	1					N
B9	siSFXN1	ACTB	UNKNOWN	SYBR	None				15.8399	15.8399								TRUE	0.0468955	TRUE	3	22	1					N
B10	siCPS1	ACTB	UNKNOWN	SYBR	None				16.1144	16.1144								TRUE	0.0468955	TRUE	3	22	1					N
B11	siCPS1	ACTB	UNKNOWN	SYBR	None				16.1618	16.1618								TRUE	0.0468955	TRUE	3	21	1					N
B12	siCPS1	ACTB	UNKNOWN	SYBR	None				16.1144	16.1144								TRUE	0.0468955	TRUE	3	22	1					N
C1	NC	MTFR2	UNKNOWN	SYBR	None				25.02	25.02								TRUE	0.0468955	TRUE	3	22	1					N
C2	NC	MTFR2	UNKNOWN	SYBR	None				24.78	24.78								TRUE	0.0468955	TRUE	3	22	1					N
C3	NC	MTFR2	UNKNOWN	SYBR	None				24.88	24.88								TRUE	0.0468955	TRUE	3	23	1					N
C4	siMTFR2	MTFR2	UNKNOWN	SYBR	None				27	27								TRUE	0.0468955	TRUE	3	23	1					N
C5	siMTFR2	MTFR2	UNKNOWN	SYBR	None				27.11	27.11								TRUE	0.0468955	TRUE	3	23	1					N
C6	siMTFR2	MTFR2	UNKNOWN	SYBR	None				26.89	26.89								TRUE	0.0468955	TRUE	3	23	1					N
C7	NC	SFXN1	UNKNOWN	SYBR	None				24.33	24.33								TRUE	0.0468955	TRUE	3	22	1					N
C8	NC	SFXN1	UNKNOWN	SYBR	None				24.8	24.8								TRUE	0.0468955	TRUE	3	22	1					N
C9	NC	SFXN1	UNKNOWN	SYBR	None				24.92	24.92								TRUE	0.0468955	TRUE	3	21	1					N
C10	siSFXN1	SFXN1	UNKNOWN	SYBR	None				27.12	27.12								TRUE	0.0468955	TRUE	3	22	1					N
C11	siSFXN1	SFXN1	UNKNOWN	SYBR	None				26.69	26.69								TRUE	0.0468955	TRUE	3	22	1					N
C12	siSFXN1	SFXN1	UNKNOWN	SYBR	None				26.97	26.97								TRUE	0.0468955	TRUE	3	22	1					N
D1	NC	MTFR2	UNKNOWN	SYBR	None				25.437	25.437								TRUE	0.0468955	TRUE	3	23	1					N
D2	NC	MTFR2	UNKNOWN	SYBR	None				24.9179	24.9179								TRUE	0.0468955	TRUE	3	23	1					N
D3	NC	MTFR2	UNKNOWN	SYBR	None				24.6986	24.6986								TRUE	0.0468955	TRUE	3	23	1					N
D4	siMTFR2	MTFR2	UNKNOWN	SYBR	None				27.0449	27.0449								TRUE	0.0468955	TRUE	3	23	1					N
D5	siMTFR2	MTFR2	UNKNOWN	SYBR	None				26.8037	26.8037								TRUE	0.040429	TRUE	3	13	1					N
D6	siMTFR2	MTFR2	UNKNOWN	SYBR	None				27.0142	27.0142								TRUE	0.040429	TRUE	3	13	1					N
D7	NC	SFXN1	UNKNOWN	SYBR	None				25.4317	25.4317								TRUE	0.040429	TRUE	3	12	1					N
D8	NC	SFXN1	UNKNOWN	SYBR	None				24.8597	24.8597								TRUE	0.040429	TRUE	3	13	1					N
D9	NC	SFXN1	UNKNOWN	SYBR	None				24.7397	24.7397								TRUE	0.040429	TRUE	3	13	1					N
D10	siSFXN1	SFXN1	UNKNOWN	SYBR	None				26.6597	26.6597								TRUE	0.040429	TRUE	3	13	1					N
D11	siSFXN1	SFXN1	UNKNOWN	SYBR	None				27.1059	27.1059								TRUE	0.0553699	TRUE	3	23	1					N
D12	siSFXN1	SFXN1	UNKNOWN	SYBR	None				26.8243	26.8243								TRUE	0.0553699	TRUE	3	23	1					N
E1	NC	CPS1	UNKNOWN	SYBR	None				25.51	25.51								TRUE	0.0553699	TRUE	3	23	1					N
E2	NC	CPS1	UNKNOWN	SYBR	None				25.33	25.33								TRUE	0.0553699	TRUE	3	22	1					N
E3	NC	CPS1	UNKNOWN	SYBR	None				25.45	25.45								TRUE	0.0553699	TRUE	3	22	1					N
E4	siCPS1	CPS1	UNKNOWN	SYBR	None				28.1	28.1								TRUE	0.0553699	TRUE	3	22	1					N
E5	siCPS1	CPS1	UNKNOWN	SYBR	None				28.02	28.02								TRUE	0.040429	TRUE	3	13	1					N
E6	siCPS1	CPS1	UNKNOWN	SYBR	None				28.14	28.14								TRUE	0.040429	TRUE	3	13	1					N
E7	NC	CPS1	UNKNOWN	SYBR	None				25.3978	25.3978								TRUE	0.040429	TRUE	3	12	1					N
E8	NC	CPS1	UNKNOWN	SYBR	None				25.4432	25.4432								TRUE	0.040429	TRUE	3	13	1					N
E9	NC	CPS1	UNKNOWN	SYBR	None				25.7452	25.7452								TRUE	0.040429	TRUE	3	13	1					N
E10	siCPS1	CPS1	UNKNOWN	SYBR	None				27.8742	27.8742								TRUE	0.040429	TRUE	3	13	1					N
E11	siCPS1	CPS1	UNKNOWN	SYBR	None				28.0701	28.0701								TRUE	0.0553699	TRUE	3	23	1					N
E12	siCPS1	CPS1	UNKNOWN	SYBR	None				27.7058	27.7058								TRUE	0.0553699	TRUE	3	23	1					N

## Sheet: fig8E(H1299,PC9)
Well	Sample Name	Target Name	Task	Reporter	Quencher	RQ	RQ Min	RQ Max	Cт	Cт Mean	Cт SD	ΔCт	ΔCт Mean	ΔCт SE	HK Control ΔCт Mean	HK Control ΔCт SE	ΔΔCт	Automatic Ct Threshold	Automatic Baseline	Efficiency	Tm1	Tm2	Tm3	Comments	HIGHSD
A1	NC	ACTB	UNKNOWN	SYBR	None				13.957	13.957								TRUE	TRUE	1					N
A2	NC	ACTB	UNKNOWN	SYBR	None				14.5953	14.5953								TRUE	TRUE	1					N
A3	NC	ACTB	UNKNOWN	SYBR	None				14.6935	14.6935								TRUE	TRUE	1					N
A4	siMTFR2	ACTB	UNKNOWN	SYBR	None				14.5026	14.5026								TRUE	TRUE	1					N
A5	siMTFR2	ACTB	UNKNOWN	SYBR	None				13.1278	13.1278								TRUE	TRUE	1					N
A6	siMTFR2	ACTB	UNKNOWN	SYBR	None				14.2362	14.2362								TRUE	TRUE	1					N
A7	siSFXN1	ACTB	UNKNOWN	SYBR	None				14.957	14.957								TRUE	TRUE	1					N
A8	siSFXN1	ACTB	UNKNOWN	SYBR	None				16.5953	16.5953								TRUE	TRUE	1					N
A9	siSFXN1	ACTB	UNKNOWN	SYBR	None				16.6935	16.6935								TRUE	TRUE	1					N
B1	NC	ACTB	UNKNOWN	SYBR	None				13.857	13.857								TRUE	TRUE	1					N
B2	NC	ACTB	UNKNOWN	SYBR	None				14.4953	14.4953								TRUE	TRUE	1					N
B3	NC	ACTB	UNKNOWN	SYBR	None				14.6335	14.6335								TRUE	TRUE	1					N
B4	siMTFR2	ACTB	UNKNOWN	SYBR	None				14.5126	14.5126								TRUE	TRUE	1					N
B5	siMTFR2	ACTB	UNKNOWN	SYBR	None				13.2578	13.2578								TRUE	TRUE	1					N
B6	siMTFR2	ACTB	UNKNOWN	SYBR	None				14.2176	14.2176								TRUE	TRUE	1					N
B7	siSFXN1	ACTB	UNKNOWN	SYBR	None				14.7006	14.7006								TRUE	TRUE	1					N
B8	siSFXN1	ACTB	UNKNOWN	SYBR	None				16.4073	16.4073								TRUE	TRUE	1					N
B9	siSFXN1	ACTB	UNKNOWN	SYBR	None				16.4776	16.4776								TRUE	TRUE	1					N
C1	NC	MTFR2	UNKNOWN	SYBR	None				23.22	23.22								TRUE	TRUE	1					N
C2	NC	MTFR2	UNKNOWN	SYBR	None				23.49	23.49								TRUE	TRUE	1					N
C3	NC	MTFR2	UNKNOWN	SYBR	None				23.14	23.14								TRUE	TRUE	1					N
C4	siMTFR2	MTFR2	UNKNOWN	SYBR	None				25.67	25.67								TRUE	TRUE	1					N
C5	siMTFR2	MTFR2	UNKNOWN	SYBR	None				24.97	24.97								TRUE	TRUE	1					N
C6	siMTFR2	MTFR2	UNKNOWN	SYBR	None				26.11	26.11								TRUE	TRUE	1					N
C7	NC	SFXN1	UNKNOWN	SYBR	None				23	23								TRUE	TRUE	1					N
C8	NC	SFXN1	UNKNOWN	SYBR	None				23.7	23.7								TRUE	TRUE	1					N
C9	NC	SFXN1	UNKNOWN	SYBR	None				23.67	23.67								TRUE	TRUE	1					N
C10	siSFXN1	SFXN1	UNKNOWN	SYBR	None				26.41	26.41								TRUE	TRUE	1					N
C11	siSFXN1	SFXN1	UNKNOWN	SYBR	None				26.89	26.89								TRUE	TRUE	1					N
C12	siSFXN1	SFXN1	UNKNOWN	SYBR	None				27.12	27.12								TRUE	TRUE	1					N
D1	NC	MTFR2	UNKNOWN	SYBR	None				23.7262	23.7262								TRUE	TRUE	1					N
D2	NC	MTFR2	UNKNOWN	SYBR	None				23.9289	23.9289								TRUE	TRUE	1					N
D3	NC	MTFR2	UNKNOWN	SYBR	None				24.1406	24.1406								TRUE	TRUE	1					N
D4	siMTFR2	MTFR2	UNKNOWN	SYBR	None				25.82	25.82								TRUE	TRUE	1					N
D5	siMTFR2	MTFR2	UNKNOWN	SYBR	None				23.7135	23.7135								TRUE	TRUE	1					N
D6	siMTFR2	MTFR2	UNKNOWN	SYBR	None				24.7275	24.7275								TRUE	TRUE	1					N
D7	NC	SFXN1	UNKNOWN	SYBR	None				23.4245	23.4245								TRUE	TRUE	1					N
D8	NC	SFXN1	UNKNOWN	SYBR	None				23.7749	23.7749								TRUE	TRUE	1					N
D9	NC	SFXN1	UNKNOWN	SYBR	None				23.7266	23.7266								TRUE	TRUE	1					N
D10	siSFXN1	SFXN1	UNKNOWN	SYBR	None				25.8374	25.8374								TRUE	TRUE	1					N
D11	siSFXN1	SFXN1	UNKNOWN	SYBR	None				28.6444	28.6444								TRUE	TRUE	1					N
D12	siSFXN1	SFXN1	UNKNOWN	SYBR	None				28.523	28.523								TRUE	TRUE	1					N
E1	NC	ACTB	UNKNOWN	SYBR	None				14.88	14.88								TRUE	TRUE	1					N
E2	NC	ACTB	UNKNOWN	SYBR	None				14.75	14.75								TRUE	TRUE	1					N
E3	NC	ACTB	UNKNOWN	SYBR	None				14.66	14.66								TRUE	TRUE	1					N
E4	siCPS1	ACTB	UNKNOWN	SYBR	None				15.67	15.67								TRUE	TRUE	1					N
E5	siCPS1	ACTB	UNKNOWN	SYBR	None				15.46	15.46								TRUE	TRUE	1					N
E6	siCPS1	ACTB	UNKNOWN	SYBR	None				15.13	15.13								TRUE	TRUE	1					N
E7	NC	ACTB	UNKNOWN	SYBR	None				14.3	14.3								TRUE	TRUE	1					N
E8	NC	ACTB	UNKNOWN	SYBR	None				14.78	14.78								TRUE	TRUE	1					N
E9	NC	ACTB	UNKNOWN	SYBR	None				14.78	14.78								TRUE	TRUE	1					N
E10	siCPS1	ACTB	UNKNOWN	SYBR	None				15.97	15.97								TRUE	TRUE	1					N
E11	siCPS1	ACTB	UNKNOWN	SYBR	None				15.47	15.47								TRUE	TRUE	1					N
E12	siCPS1	ACTB	UNKNOWN	SYBR	None				15.78	15.78								TRUE	TRUE	1					N
F1	NC	CPS1	UNKNOWN	SYBR	None				23.44	23.44								TRUE	TRUE	1					N
F2	NC	CPS1	UNKNOWN	SYBR	None				23.65	23.65								TRUE	TRUE	1					N
F3	NC	CPS1	UNKNOWN	SYBR	None				23.47	23.47								TRUE	TRUE	1					N
F4	siCPS1	CPS1	UNKNOWN	SYBR	None				27.12	27.12								TRUE	TRUE	1					N
F5	siCPS1	CPS1	UNKNOWN	SYBR	None				26.99	26.99								TRUE	TRUE	1					N
F6	siCPS1	CPS1	UNKNOWN	SYBR	None				27.1	27.1								TRUE	TRUE	1					N
F7	NC	CPS1	UNKNOWN	SYBR	None				24.3194	24.3194								TRUE	TRUE	1					N
F8	NC	CPS1	UNKNOWN	SYBR	None				24.2212	24.2212								TRUE	TRUE	1					N
F9	NC	CPS1	UNKNOWN	SYBR	None				24.1052	24.1052								TRUE	TRUE	1					N
F10	siCPS1	CPS1	UNKNOWN	SYBR	None				27.439	27.439								TRUE	TRUE	1					N
F11	siCPS1	CPS1	UNKNOWN	SYBR	None				26.7927	26.7927								TRUE	TRUE	1					N
F12	siCPS1	CPS1	UNKNOWN	SYBR	None				26.5946	26.5946								TRUE	TRUE	1					N

## Sheet: fig8(ABC)-2
Color	Position	Sample Name	Gene Name	Cq	Concentration	Call	Excluded	Sample Type	Standard	Cq Mean	Cq Error	Concentration Mean	Concentration Error	Replicate Group	Dye	Edited Call	Failure	Notes	Sample Prep Notes	Number
255;132;197;238	A1	H1975 1	TUBULIN	13.29	-	Positive	Unchecked	Unknown	-	13.29	0	-	-		SYBR Green I		None			1
255;103;103;103	A2	H1975 2	TUBULIN	13.53	-	Positive	Unchecked	Unknown	-	13.53	0	-	-		SYBR Green I		None			2
255;242;138;21	A3	H1975 3	TUBULIN	13.42	-	Positive	Unchecked	Unknown	-	13.42	0	-	-		SYBR Green I		None			3
255;250;215;15	A4	PC9 1	TUBULIN	14.31	-	Positive	Unchecked	Unknown	-	14.31	0	-	-		SYBR Green I		None			4
255;103;154;47	A5	PC9 2	TUBULIN	14.35	-	Positive	Unchecked	Unknown	-	14.35	0	-	-		SYBR Green I		None			5
255;180;73;149	A6	PC9 3	TUBULIN	14.32	-	Positive	Unchecked	Unknown	-	14.32	0	-	-		SYBR Green I		None			6
255;66;41;24	B1	H1975 1	TUBULIN	13.39	-	Positive	Unchecked	Unknown	-	13.39	0	-	-		SYBR Green I		None			13
255;132;197;238	B2	H1975 2	TUBULIN	13.58	-	Positive	Unchecked	Unknown	-	13.58	0	-	-		SYBR Green I		None			14
255;103;103;103	B3	H1975 3	TUBULIN	13.58	-	Positive	Unchecked	Unknown	-	13.58	0	-	-		SYBR Green I		None			15
255;242;138;21	B4	PC9 1	TUBULIN	14.3	-	Positive	Unchecked	Unknown	-	14.3	0	-	-		SYBR Green I		None			16
255;250;215;15	B5	PC9 2	TUBULIN	14.26	-	Positive	Unchecked	Unknown	-	14.26	0	-	-		SYBR Green I		None			17
255;103;154;47	B6	PC9 3	TUBULIN	14.34	-	Positive	Unchecked	Unknown	-	14.34	0	-	-		SYBR Green I		None			18
255;234;79;79	C1	H1975 1	MTFR2	18.34	-	Positive	Unchecked	Unknown	-	18.34	0	-	-		SYBR Green I		None			25
255;66;41;24	C2	H1975 2	MTFR2	18.34	-	Positive	Unchecked	Unknown	-	18.34	0	-	-		SYBR Green I		None			26
255;132;197;238	C3	H1975 3	MTFR2	18.3	-	Positive	Unchecked	Unknown	-	18.3	0	-	-		SYBR Green I		None			27
255;103;103;103	C4	PC9 1	MTFR2	19.78	-	Positive	Unchecked	Unknown	-	19.78	0	-	-		SYBR Green I		None			28
255;242;138;21	C5	PC9 2	MTFR2	19.33	-	Positive	Unchecked	Unknown	-	19.33	0	-	-		SYBR Green I		None			29
255;250;215;15	C6	PC9 3	MTFR2	19.55	-	Positive	Unchecked	Unknown	-	19.55	0	-	-		SYBR Green I		None			30
255;47;73;113	D1	H1975 1	MTFR2	18.4647	-	Positive	Unchecked	Unknown	-	18.4647	0	-	-		SYBR Green I		None			37
255;234;79;79	D2	H1975 2	MTFR2	18.656	-	Positive	Unchecked	Unknown	-	18.656	0	-	-		SYBR Green I		None			38
255;66;41;24	D3	H1975 3	MTFR2	18.342	-	Positive	Unchecked	Unknown	-	18.342	0	-	-		SYBR Green I		None			39
255;132;197;238	D4	PC9 1	MTFR2	19.3882	-	Positive	Unchecked	Unknown	-	19.3882	0	-	-		SYBR Green I		None			40
255;103;103;103	D5	PC9 2	MTFR2	19.4663	-	Positive	Unchecked	Unknown	-	19.4663	0	-	-		SYBR Green I		None			41
255;242;138;21	D6	PC9 3	MTFR2	18.9424	-	Positive	Unchecked	Unknown	-	18.9424	0	-	-		SYBR Green I		None			42
255;34;176;146	E1	H1975 1	SFXN1	17.43	-	Positive	Unchecked	Unknown	-	17.43	0	-	-		SYBR Green I		None			49
255;47;73;113	E2	H1975 2	SFXN1	17.54	-	Positive	Unchecked	Unknown	-	17.54	0	-	-		SYBR Green I		None			50
255;234;79;79	E3	H1975 3	SFXN1	17.41	-	Positive	Unchecked	Unknown	-	17.41	0	-	-		SYBR Green I		None			51
255;66;41;24	E4	PC9 1	SFXN1	19.65	-	Positive	Unchecked	Unknown	-	19.65	0	-	-		SYBR Green I		None			52
255;132;197;238	E5	PC9 2	SFXN1	19.32	-	Positive	Unchecked	Unknown	-	19.32	0	-	-		SYBR Green I		None			53
255;103;103;103	E6	PC9 3	SFXN1	19.21	-	Positive	Unchecked	Unknown	-	19.21	0	-	-		SYBR Green I		None			54
255;205;18;55	F1	H1975 1	SFXN1	17.5006	-	Positive	Unchecked	Unknown	-	17.5006	0	-	-		SYBR Green I		None			61
255;34;176;146	F2	H1975 2	SFXN1	17.6382	-	Positive	Unchecked	Unknown	-	17.6382	0	-	-		SYBR Green I		None			62
255;47;73;113	F3	H1975 3	SFXN1	17.5357	-	Positive	Unchecked	Unknown	-	17.5357	0	-	-		SYBR Green I		None			63
255;234;79;79	F4	PC9 1	SFXN1	19.2853	-	Positive	Unchecked	Unknown	-	19.2853	0	-	-		SYBR Green I		None			64
255;66;41;24	F5	PC9 2	SFXN1	19.1473	-	Positive	Unchecked	Unknown	-	19.1473	0	-	-		SYBR Green I		None			65
255;132;197;238	F6	PC9 3	SFXN1	18.845	-	Positive	Unchecked	Unknown	-	18.845	0	-	-		SYBR Green I		None			66
255;95;103;174	G1	H1975 1	CPS1	20.11	-	Positive	Unchecked	Unknown	-	20.11	0	-	-		SYBR Green I		None			73
255;205;18;55	G2	H1975 2	CPS1	20.14	-	Positive	Unchecked	Unknown	-	20.14	0	-	-		SYBR Green I		None			74
255;34;176;146	G3	H1975 3	CPS1	20.03	-	Positive	Unchecked	Unknown	-	20.03	0	-	-		SYBR Green I		None			75
255;47;73;113	G4	PC9 1	CPS1	20.13	-	Positive	Unchecked	Unknown	-	20.13	0	-	-		SYBR Green I		None			76
255;234;79;79	G5	PC9 2	CPS1	20.45	-	Positive	Unchecked	Unknown	-	20.45	0	-	-		SYBR Green I		None			77
255;66;41;24	G6	PC9 3	CPS1	20.54	-	Positive	Unchecked	Unknown	-	20.54	0	-	-		SYBR Green I		None			78
255;180;73;149	H1	H1975 1	CPS1	19.8629	-	Positive	Unchecked	Unknown	-	19.8629	0	-	-		SYBR Green I		None			85
255;95;103;174	H2	H1975 2	CPS1	20.1014	-	Positive	Unchecked	Unknown	-	20.1014	0	-	-		SYBR Green I		None			86
255;205;18;55	H3	H1975 3	CPS1	19.9701	-	Positive	Unchecked	Unknown	-	19.9701	0	-	-		SYBR Green I		None			87
255;34;176;146	H4	PC9 1	CPS1	21.0712	-	Positive	Unchecked	Unknown	-	21.0712	0	-	-		SYBR Green I		None			88
255;47;73;113	H5	PC9 2	CPS1	20.5997	-	Positive	Unchecked	Unknown	-	20.5997	0	-	-		SYBR Green I		None			89
255;234;79;79	H6	PC9 3	CPS1	20.4685	-	Positive	Unchecked	Unknown	-	20.4685	0	-	-		SYBR Green I		None			90

## Sheet: fig10
Well	Sample Name	Target Name	Task	Reporter	Quencher	RQ	RQ Min	RQ Max	Cт	Cт Mean	Cт SD	ΔCт	ΔCт Mean	ΔCт SE	HK Control ΔCт Mean	HK Control ΔCт SE	ΔΔCт	Automatic Ct Threshold	Automatic Baseline	Efficiency	Tm1	Tm2	Tm3	Comments	HIGHSD
A1	NC	TERT	UNKNOWN	SYBR	None				20.6017	20.6017								TRUE	TRUE	1					N
A2	NC	TERT	UNKNOWN	SYBR	None				20.5553	20.5553								TRUE	TRUE	1					N
A3	NC	TERT	UNKNOWN	SYBR	None				20.3834	20.3834								TRUE	TRUE	1					N
A4	siMTFR2	TERT	UNKNOWN	SYBR	None				20.8286	20.8286								TRUE	TRUE	1					N
A5	siMTFR2	TERT	UNKNOWN	SYBR	None				20.832	20.832								TRUE	TRUE	1					N
A6	siMTFR2	TERT	UNKNOWN	SYBR	None				20.6698	20.6698								TRUE	TRUE	1					N
A7	siSFXN1	TERT	UNKNOWN	SYBR	None				21.686	21.686								TRUE	TRUE	1					N
A8	siSFXN1	TERT	UNKNOWN	SYBR	None				21.7319	21.7319								TRUE	TRUE	1					N
A9	siSFXN1	TERT	UNKNOWN	SYBR	None				21.8144	21.8144								TRUE	TRUE	1					N
A10	siCPS1	TERT	UNKNOWN	SYBR	None				20.8796	20.8796								TRUE	TRUE	1					N
A11	siCPS1	TERT	UNKNOWN	SYBR	None				20.9014	20.9014								TRUE	TRUE	1					N
A12	siCPS1	TERT	UNKNOWN	SYBR	None				20.9662	20.9662								TRUE	TRUE	1					N
B1	NC	TERT	UNKNOWN	SYBR	None				20.5246	20.5246								TRUE	TRUE	1					N
B2	NC	TERT	UNKNOWN	SYBR	None				20.557	20.557								TRUE	TRUE	1					N
B3	NC	TERT	UNKNOWN	SYBR	None				20.3819	20.3819								TRUE	TRUE	1					N
B4	siMTFR2	TERT	UNKNOWN	SYBR	None				20.9039	20.9039								TRUE	TRUE	1					N
B5	siMTFR2	TERT	UNKNOWN	SYBR	None				20.7705	20.7705								TRUE	TRUE	1					N
B6	siMTFR2	TERT	UNKNOWN	SYBR	None				20.7475	20.7475								TRUE	TRUE	1					N
B7	siSFXN1	TERT	UNKNOWN	SYBR	None				21.6842	21.6842								TRUE	TRUE	1					N
B8	siSFXN1	TERT	UNKNOWN	SYBR	None				21.7733	21.7733								TRUE	TRUE	1					N
B9	siSFXN1	TERT	UNKNOWN	SYBR	None				21.7888	21.7888								TRUE	TRUE	1					N
B10	siCPS1	TERT	UNKNOWN	SYBR	None				20.7797	20.7797								TRUE	TRUE	1					N
B11	siCPS1	TERT	UNKNOWN	SYBR	None				20.9412	20.9412								TRUE	TRUE	1					N
B12	siCPS1	TERT	UNKNOWN	SYBR	None				20.9452	20.9452								TRUE	TRUE	1					N
C1	NC	ND1	UNKNOWN	SYBR	None				16.07	16.07								TRUE	TRUE	1					N
C2	NC	ND1	UNKNOWN	SYBR	None				16.01	16.01								TRUE	TRUE	1					N
C3	NC	ND1	UNKNOWN	SYBR	None				16.11	16.11								TRUE	TRUE	1					N
C4	siMTFR2	ND1	UNKNOWN	SYBR	None				16.78	16.78								TRUE	TRUE	1					N
C5	siMTFR2	ND1	UNKNOWN	SYBR	None				16.9	16.9								TRUE	TRUE	1					N
C6	siMTFR2	ND1	UNKNOWN	SYBR	None				16.78	16.78								TRUE	TRUE	1					N
C7	siSFXN1	ND1	UNKNOWN	SYBR	None				19.21	19.21								TRUE	TRUE	1					N
C8	siSFXN1	ND1	UNKNOWN	SYBR	None				20.01	20.01								TRUE	TRUE	1					N
C9	siSFXN1	ND1	UNKNOWN	SYBR	None				19.14	19.14								TRUE	TRUE	1					N
C10	siCPS1	ND1	UNKNOWN	SYBR	None				18.11	18.11								TRUE	TRUE	1					N
C11	siCPS1	ND1	UNKNOWN	SYBR	None				17.87	17.87								TRUE	TRUE	1					N
C12	siCPS1	ND1	UNKNOWN	SYBR	None				17.84	17.84								TRUE	TRUE	1					N
D1	NC	ND1	UNKNOWN	SYBR	None				16.118	16.118								TRUE	TRUE	1					N
D2	NC	ND1	UNKNOWN	SYBR	None				15.871	15.871								TRUE	TRUE	1					N
D3	NC	ND1	UNKNOWN	SYBR	None				15.1731	15.1731								TRUE	TRUE	1					N
D4	siMTFR2	ND1	UNKNOWN	SYBR	None				17.1778	17.1778								TRUE	TRUE	1					N
D5	siMTFR2	ND1	UNKNOWN	SYBR	None				16.9031	16.9031								TRUE	TRUE	1					N
D6	siMTFR2	ND1	UNKNOWN	SYBR	None				16.8147	16.8147								TRUE	TRUE	1					N
D7	siSFXN1	ND1	UNKNOWN	SYBR	None				19.3697	19.3697								TRUE	TRUE	1					N
D8	siSFXN1	ND1	UNKNOWN	SYBR	None				18.6414	18.6414								TRUE	TRUE	1					N
D9	siSFXN1	ND1	UNKNOWN	SYBR	None				19.5445	19.5445								TRUE	TRUE	1					N
D10	siCPS1	ND1	UNKNOWN	SYBR	None				17.4299	17.4299								TRUE	TRUE	1					N
D11	siCPS1	ND1	UNKNOWN	SYBR	None				17.814	17.814								TRUE	TRUE	1					N
D12	siCPS1	ND1	UNKNOWN	SYBR	None				17.872	17.872								TRUE	TRUE	1					N
